# Supplementary material for: Genome-wide multi-omics profiling of the 8p11-p12 amplicon in breast carcinoma
Source: PubMed Central journal article supplement (PMC5963621; doi:10.18632/oncotarget.25329), 2018-05-08
Supplement: oncotarget-09-24140-s001.pdf [file oncotarget-09-24140-s001.pdf]

# Genome-wide multi-omics profiling of the 8p11-p12 amplicon in breast carcinoma

## SUPPLEMENTARY MATERIALS

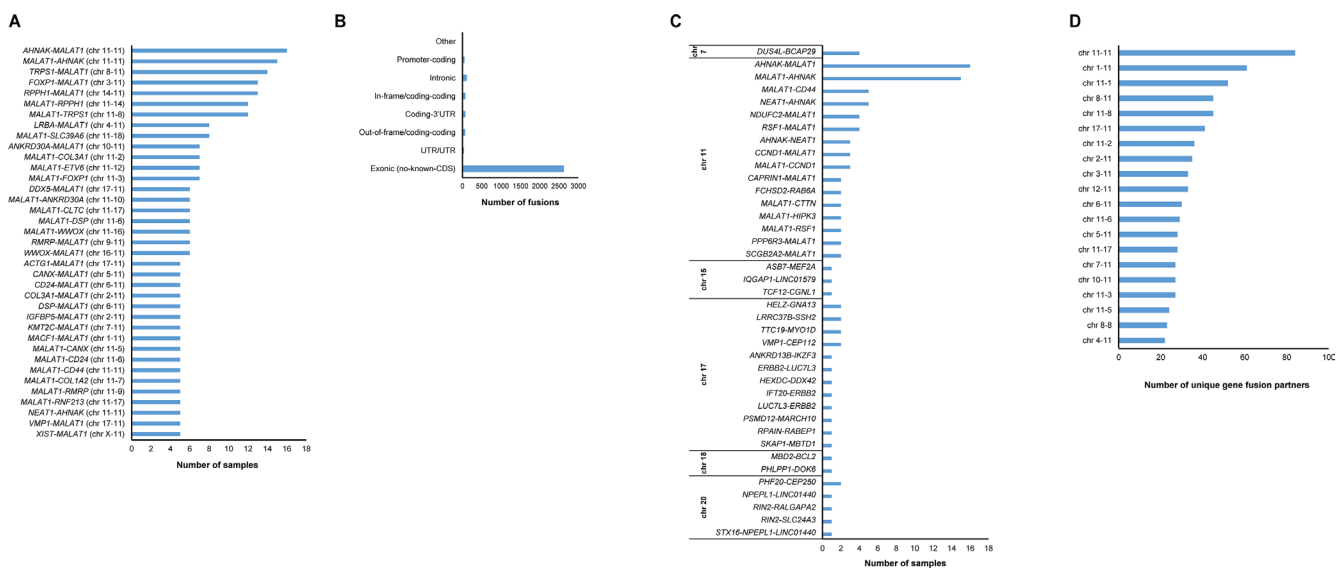

**Supplementary Figure 1: The *MALAT1* ncRNA is a promiscuous gene fusion partner in 8p11-p12 amplified breast carcinomas.** Bar plots depicting (A) recurrent fusion transcripts found in at least five samples, (B) the distribution of the predicted effect of the 3,052 identified fusion transcripts, (C) intrachromosomal fusions, and (D) the number of unique gene fusion partners in the top 20 chromosome (chr) pairs.

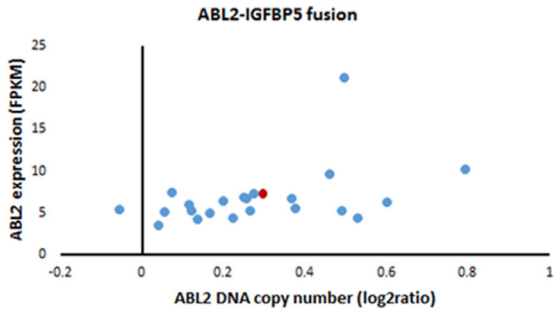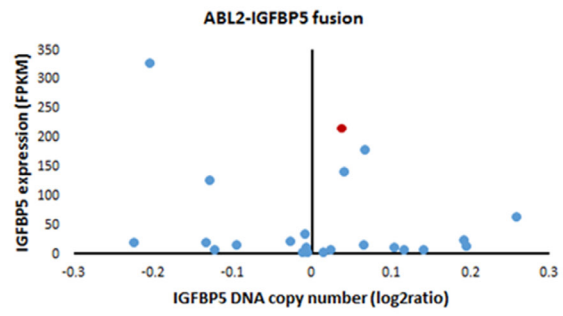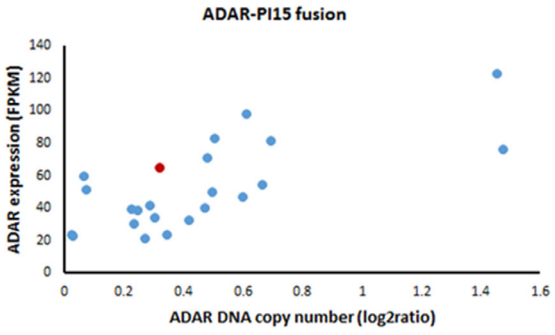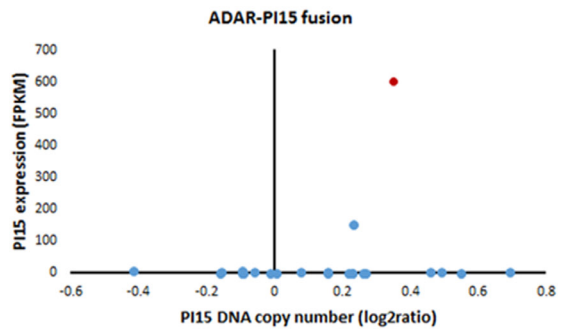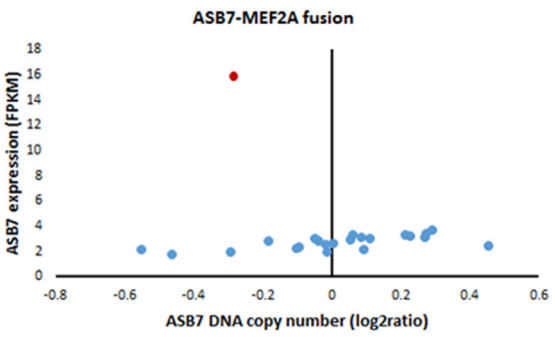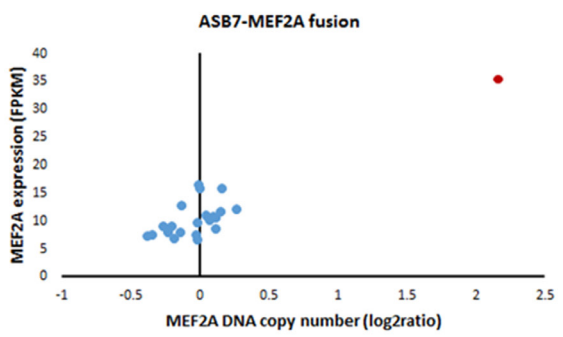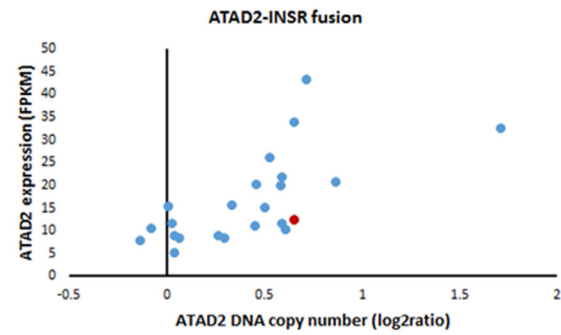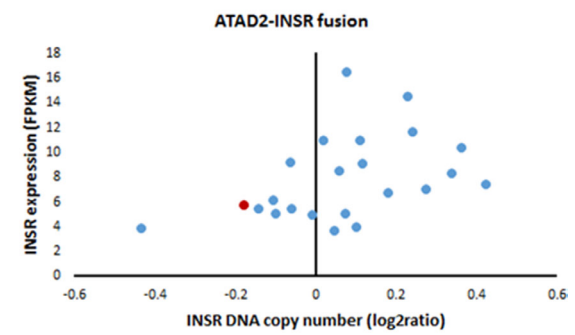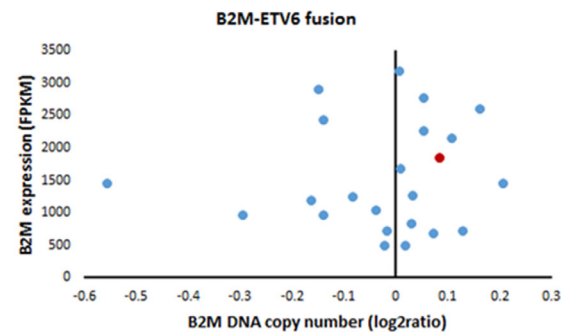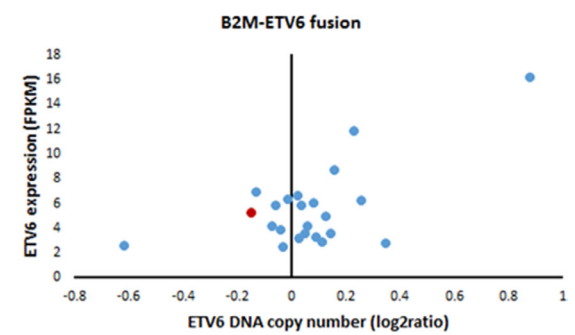

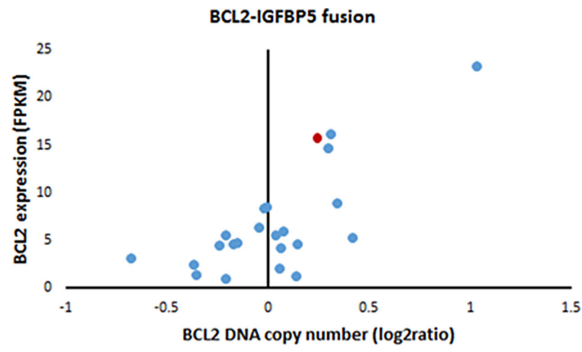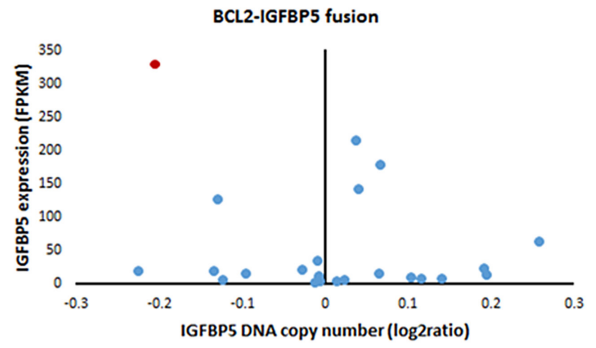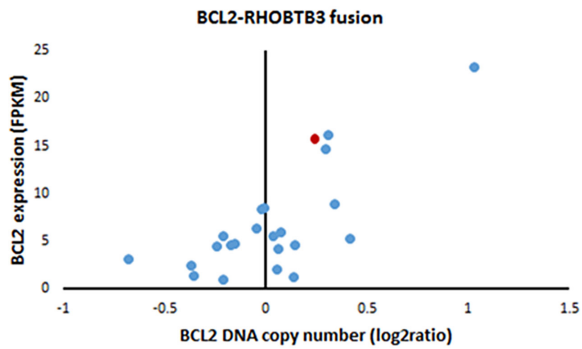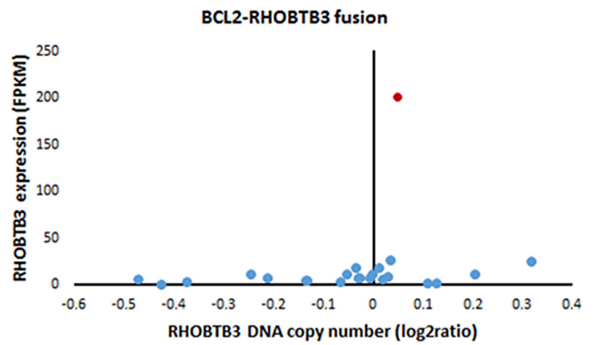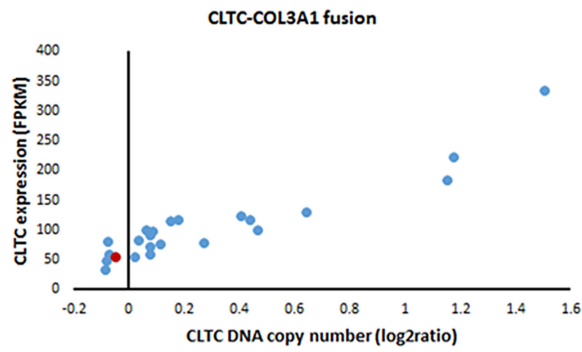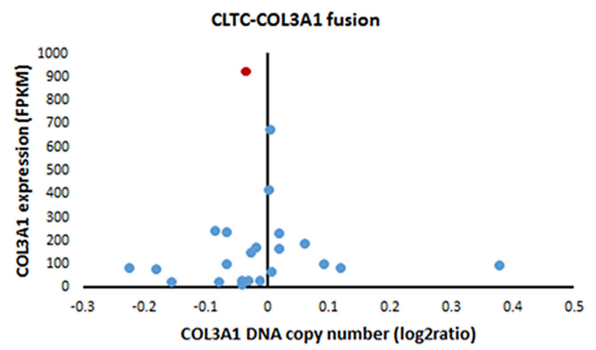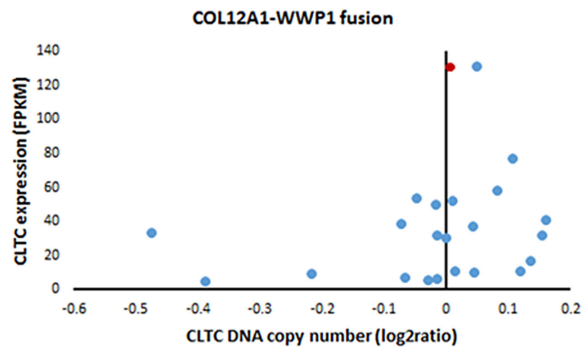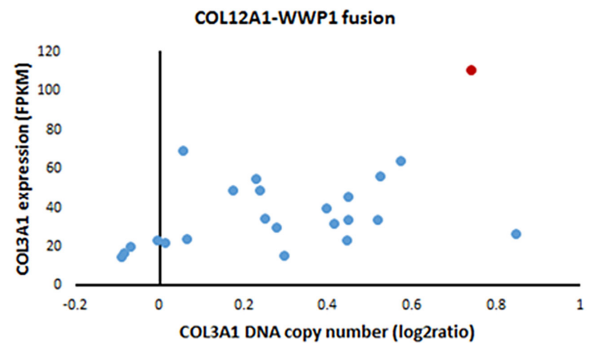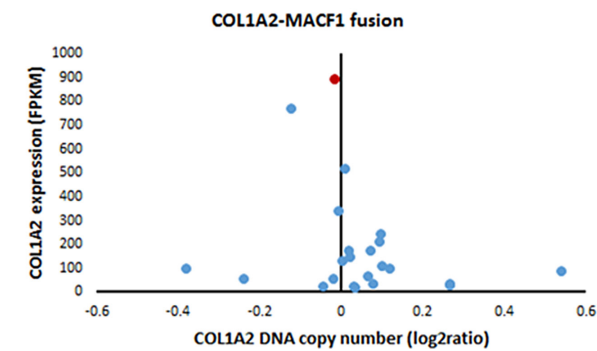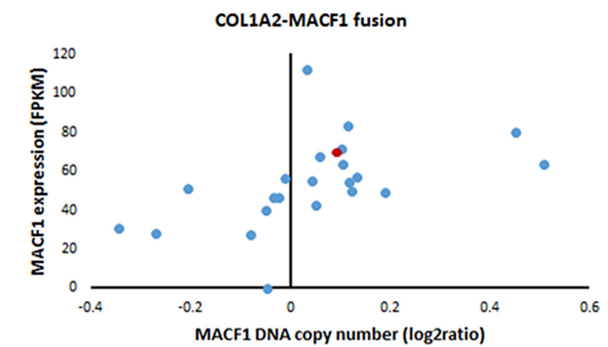

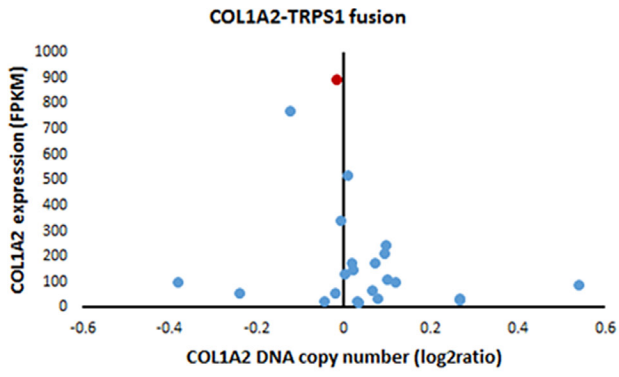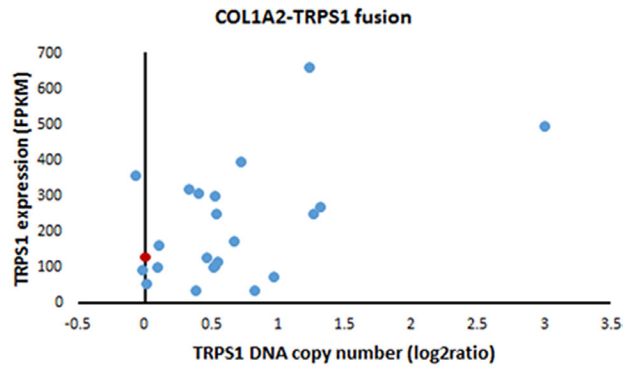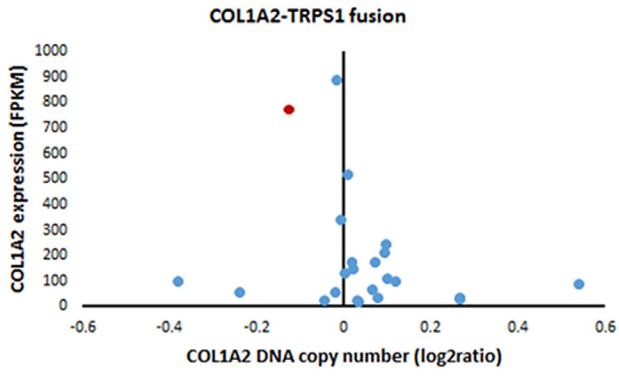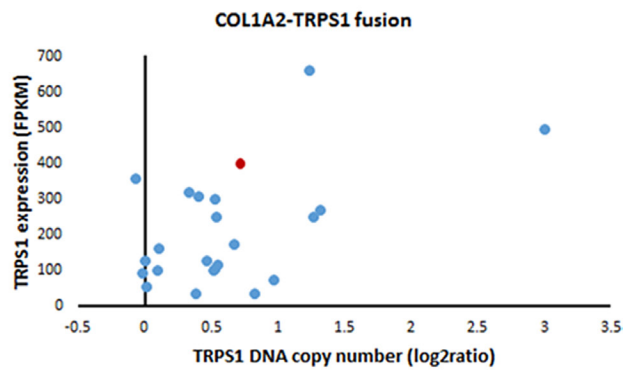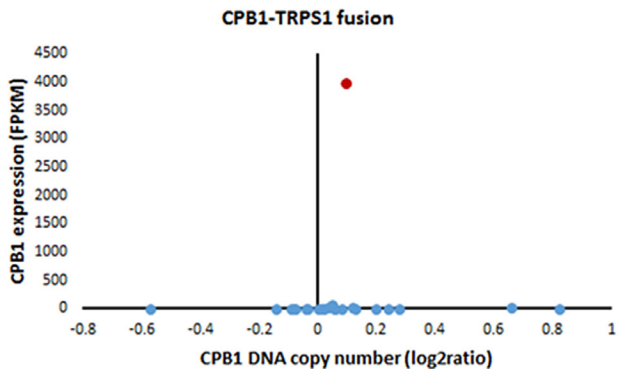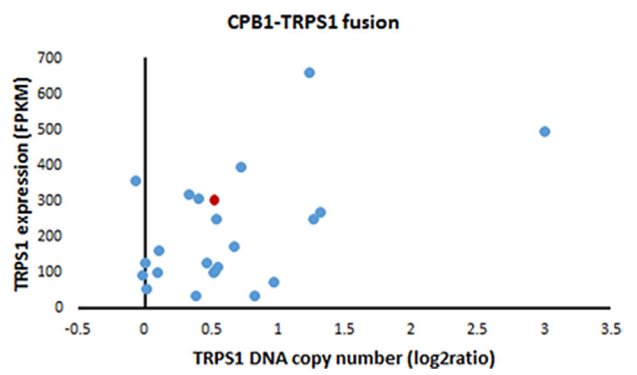

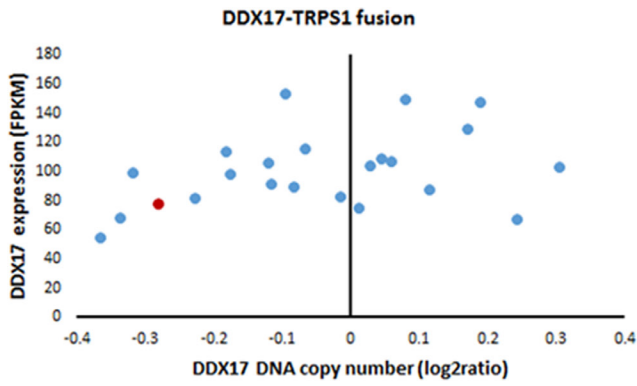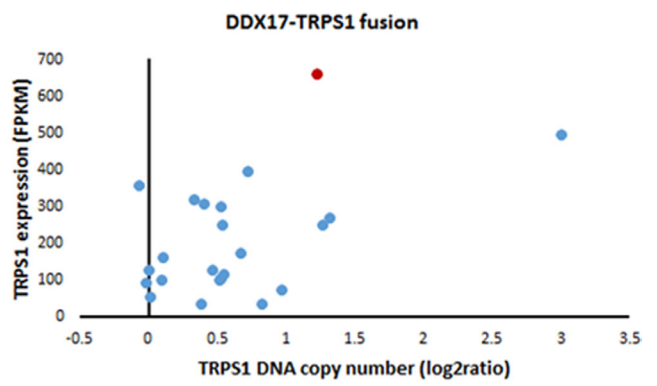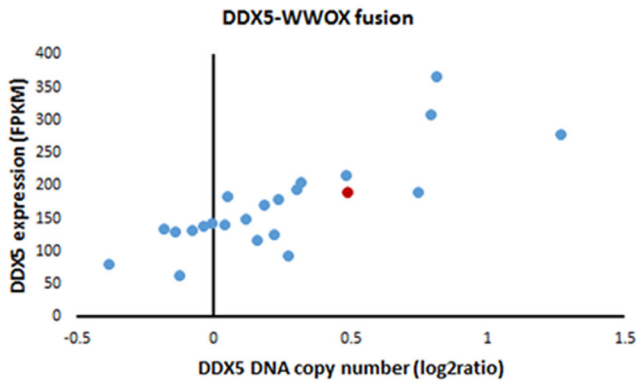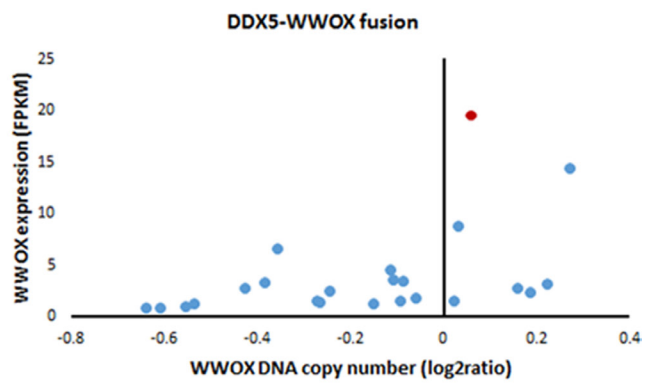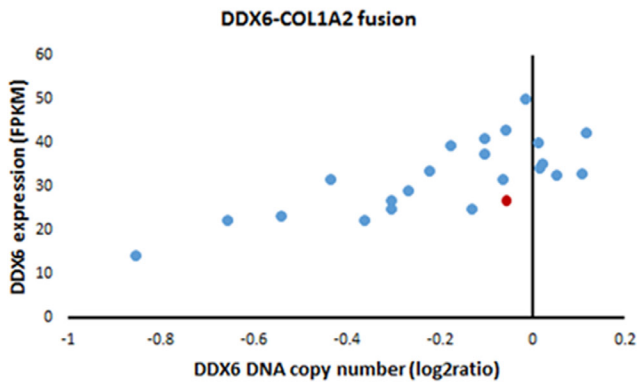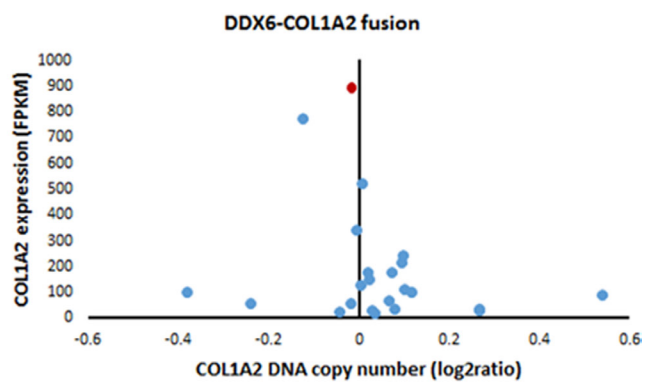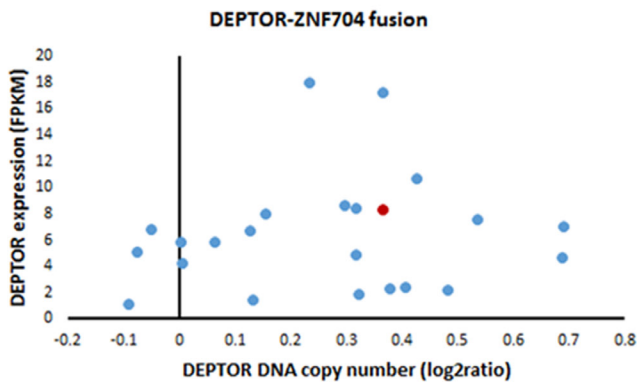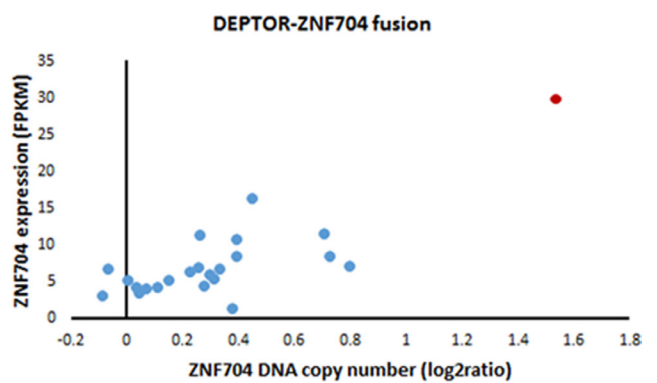

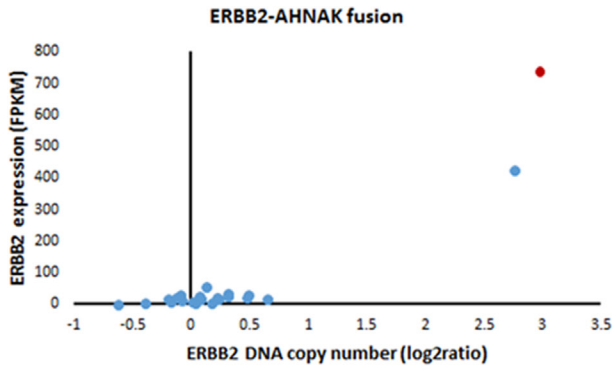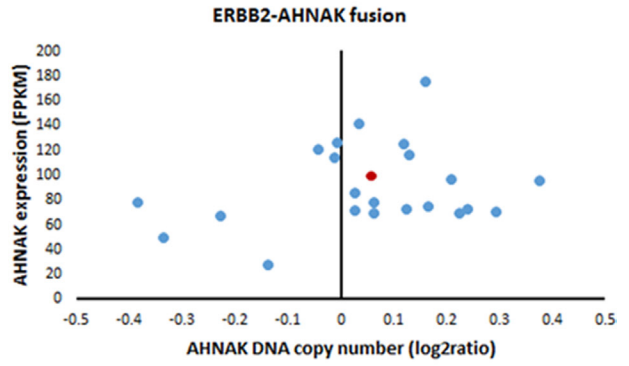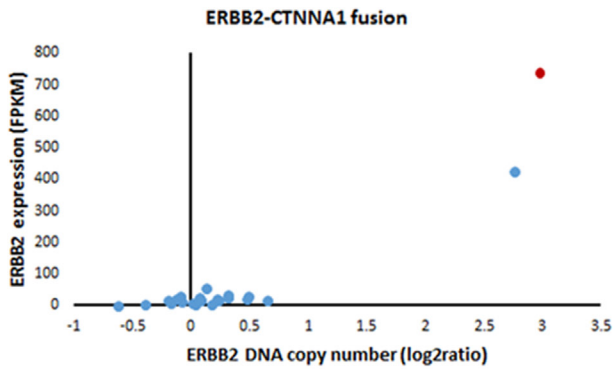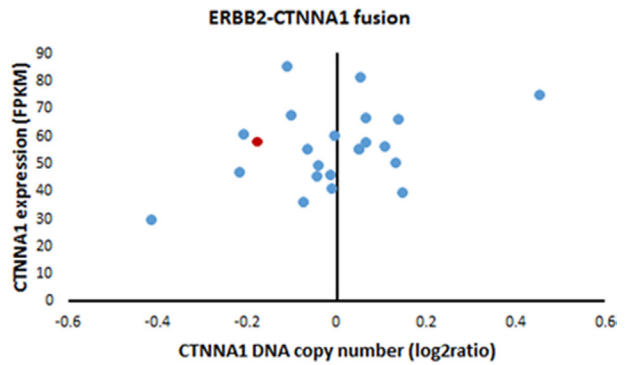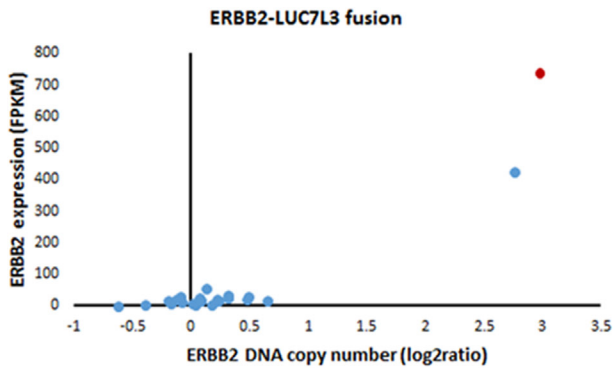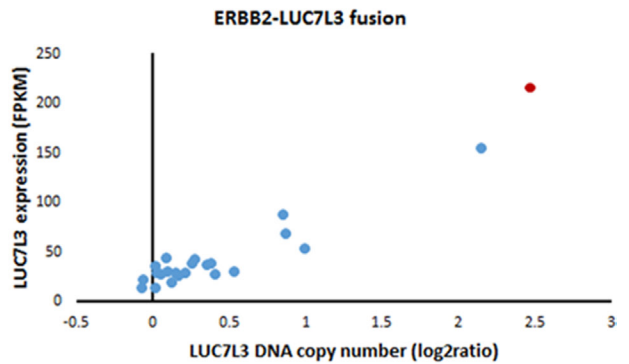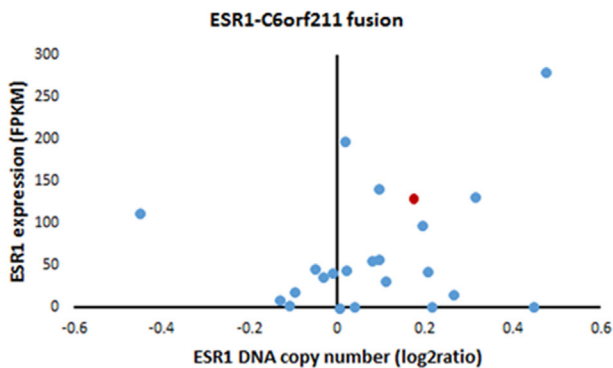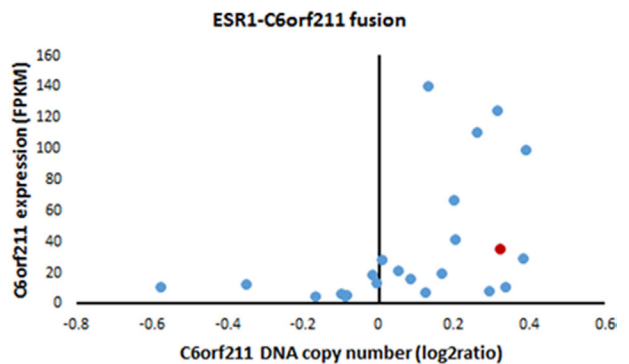

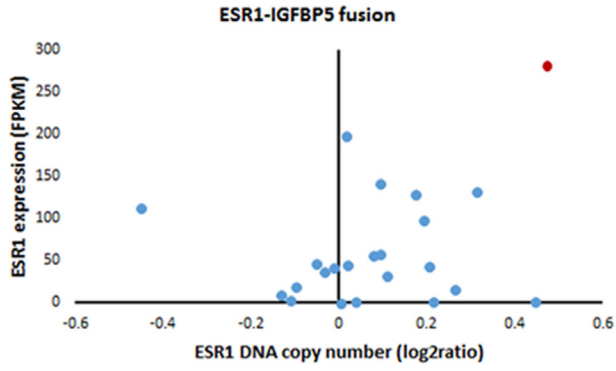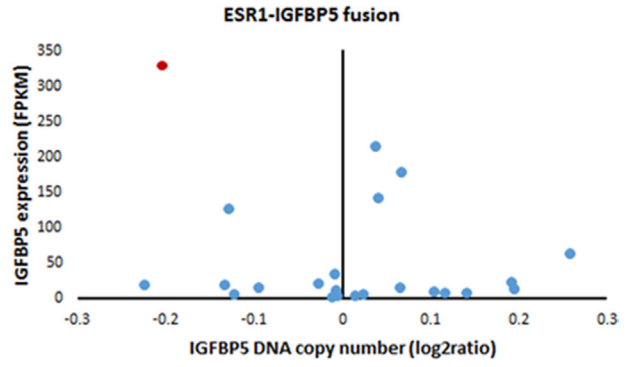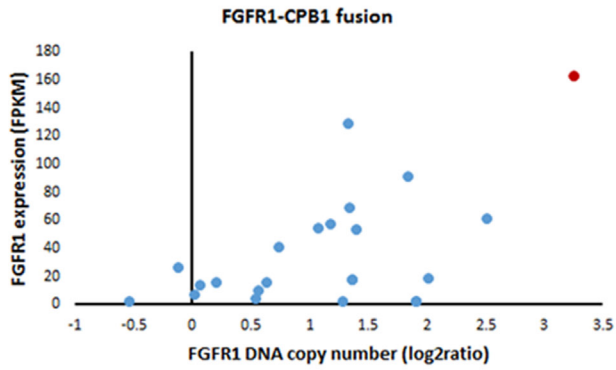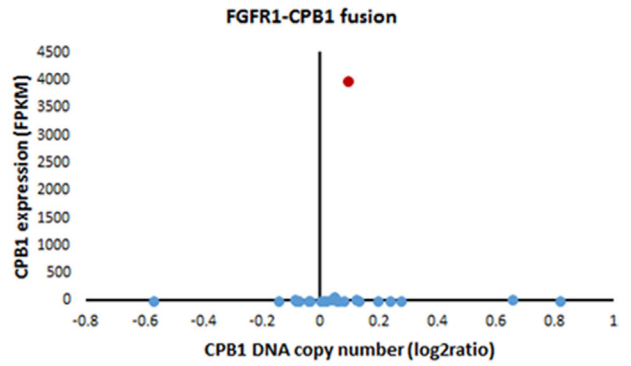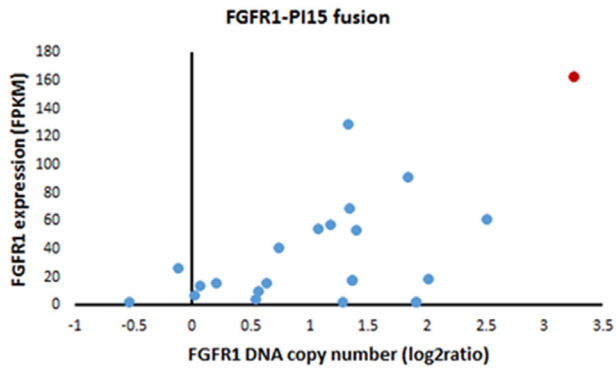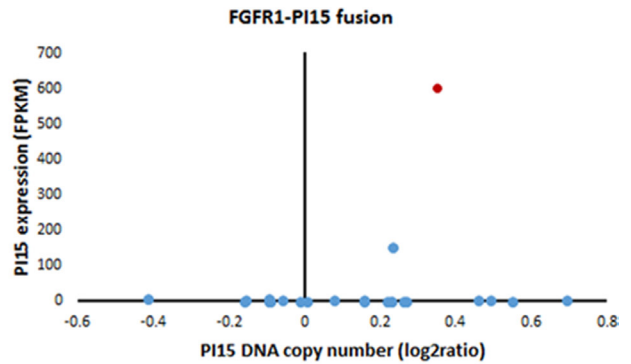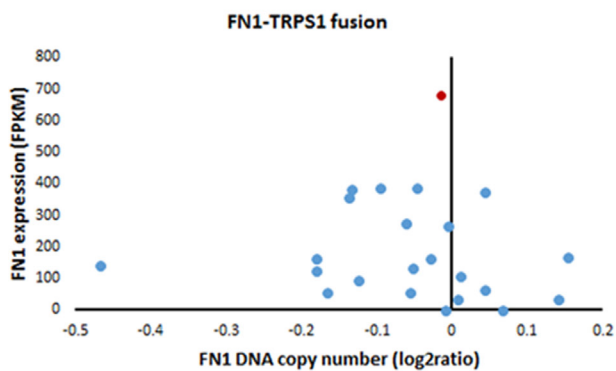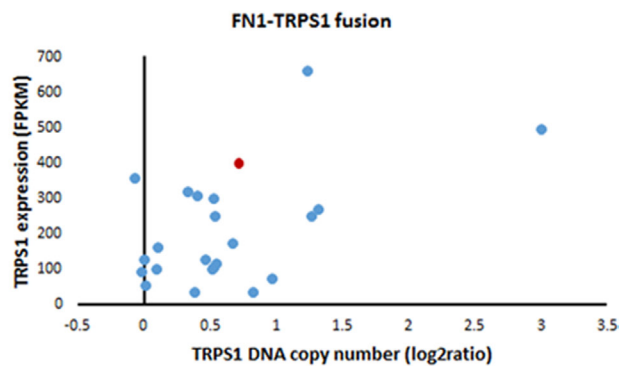

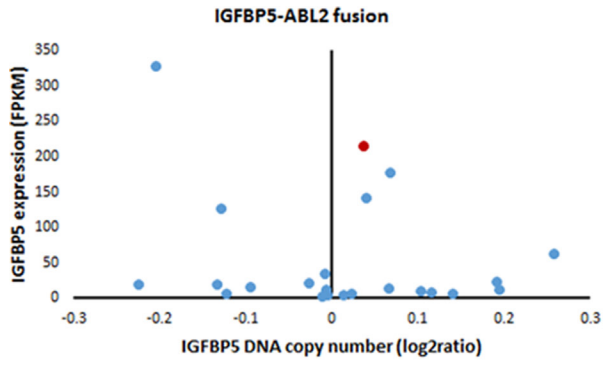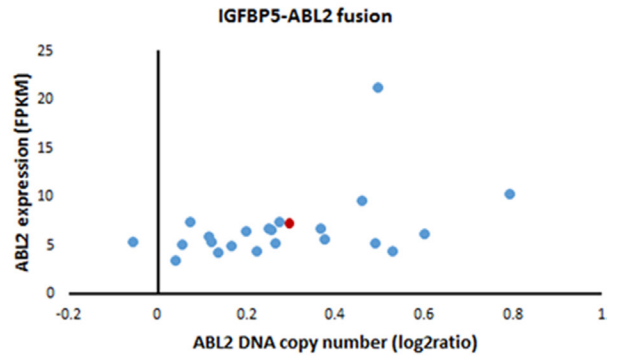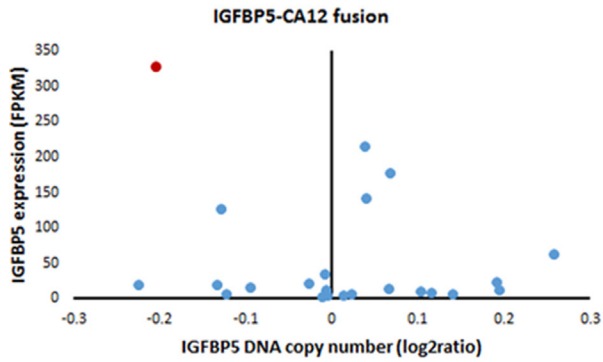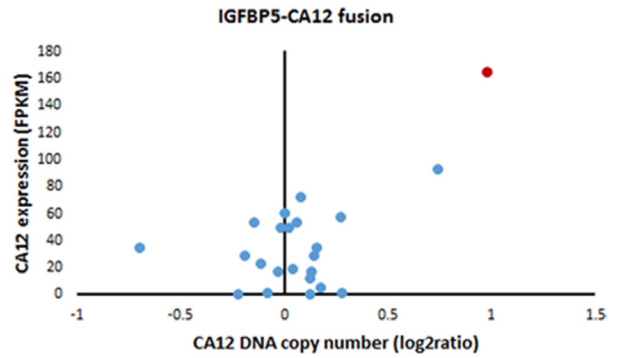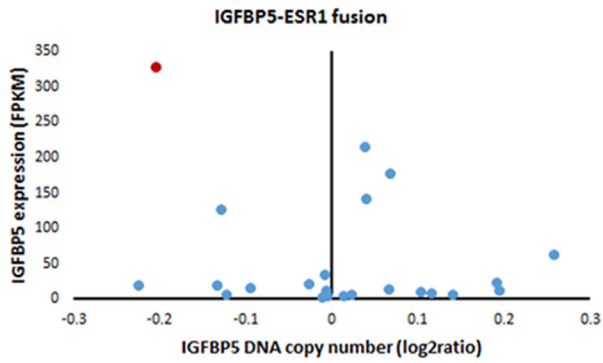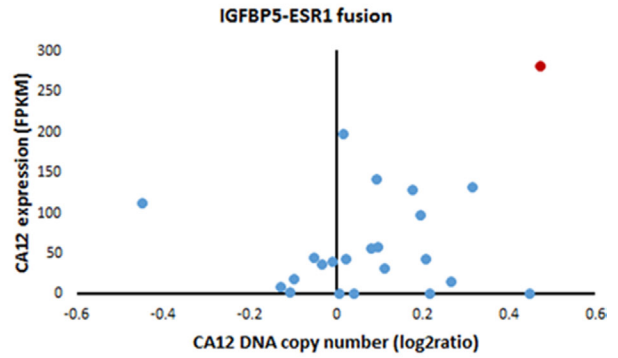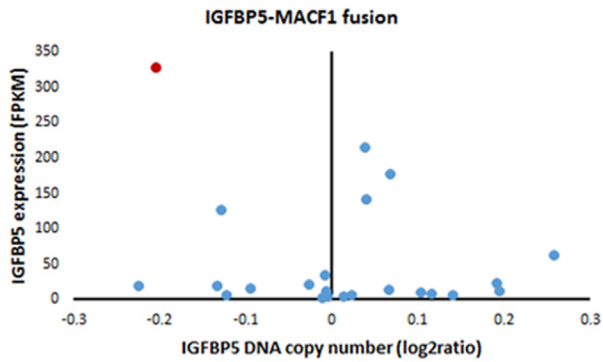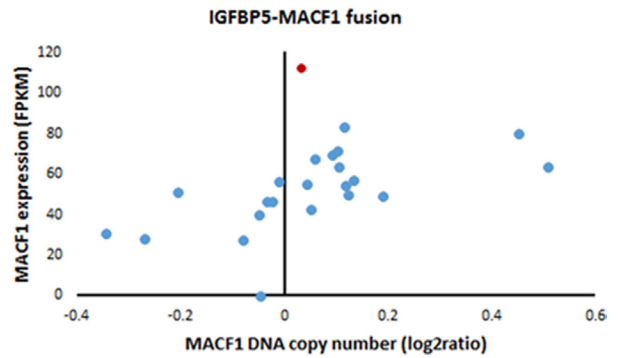



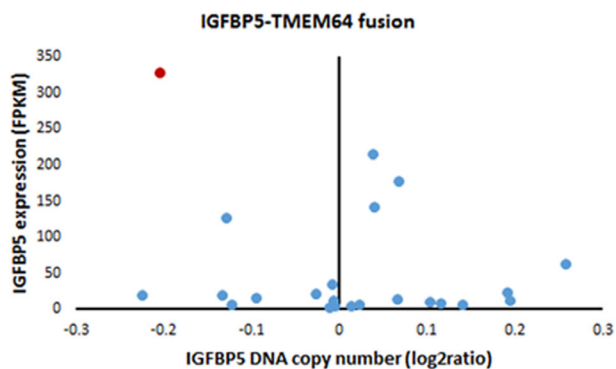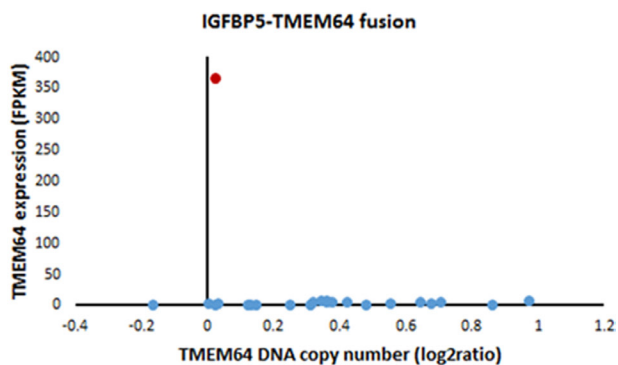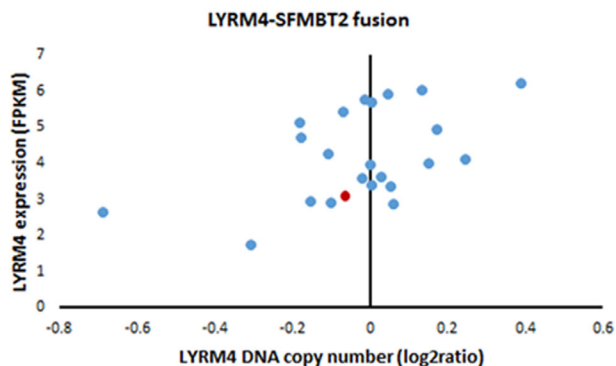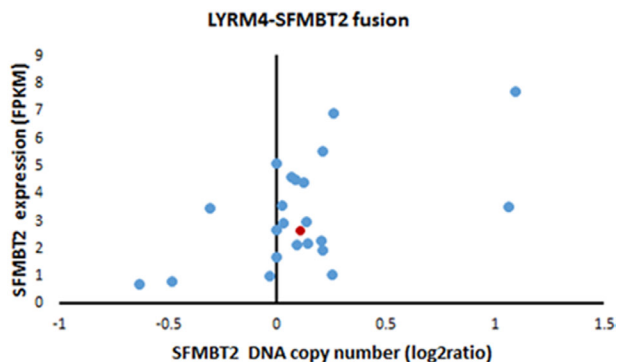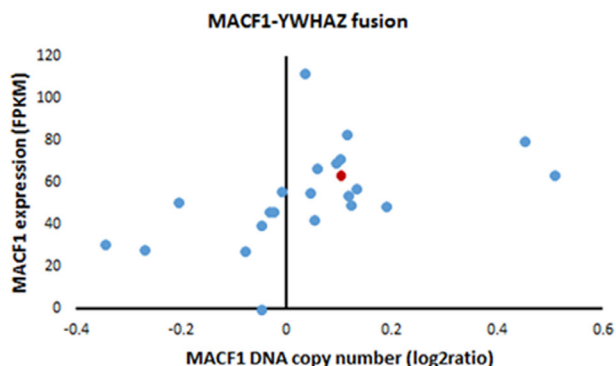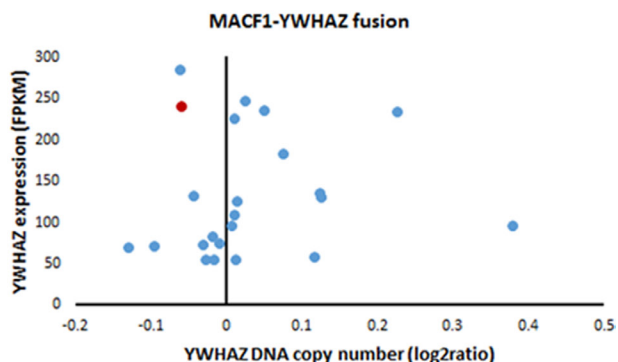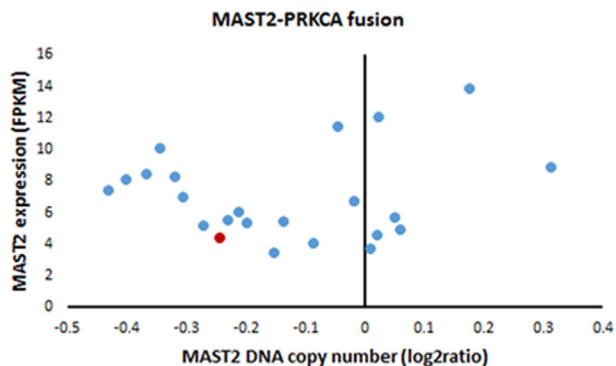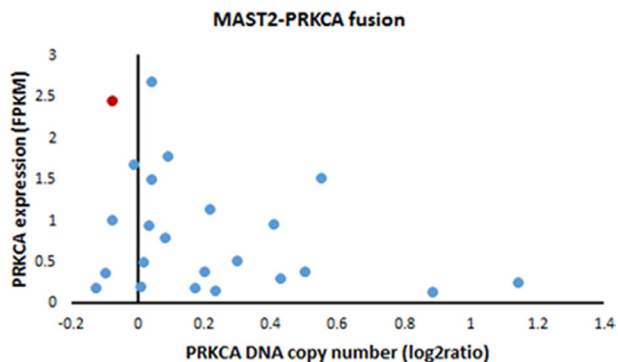

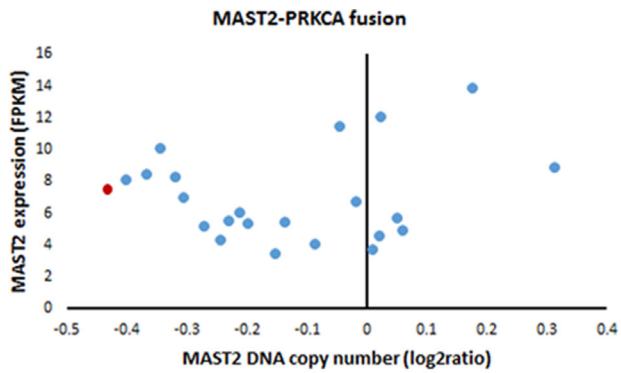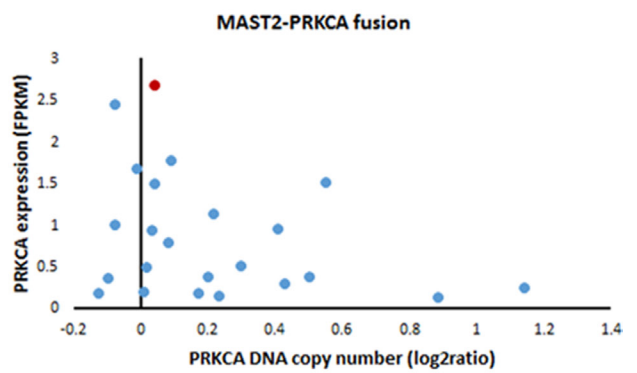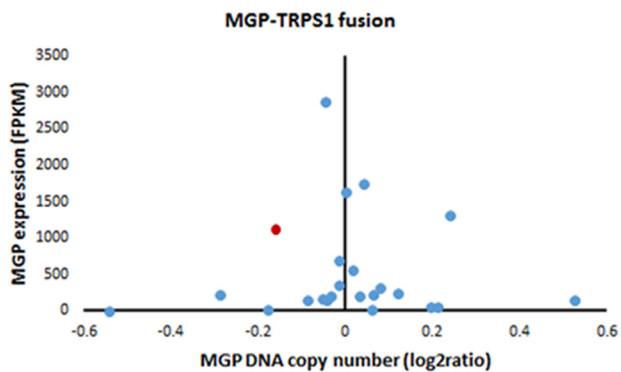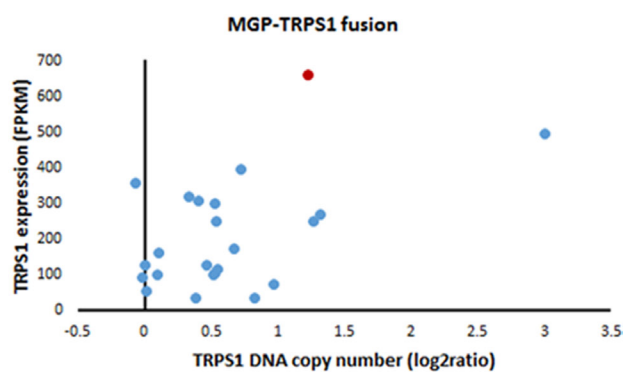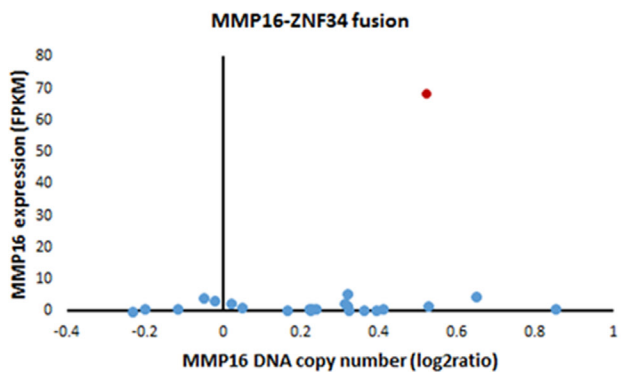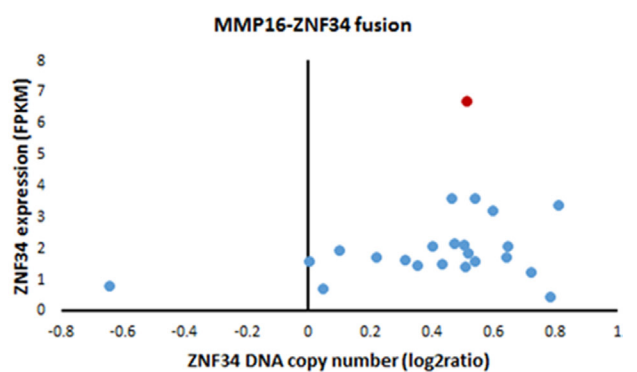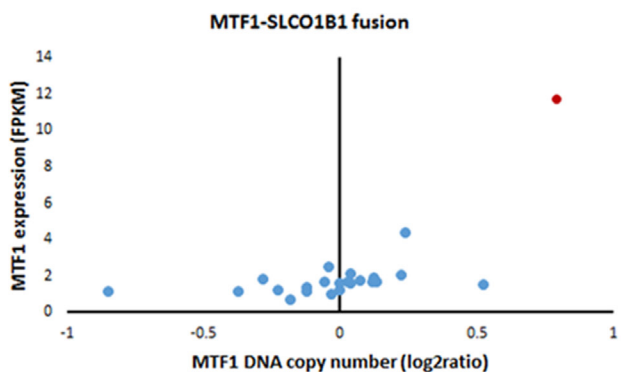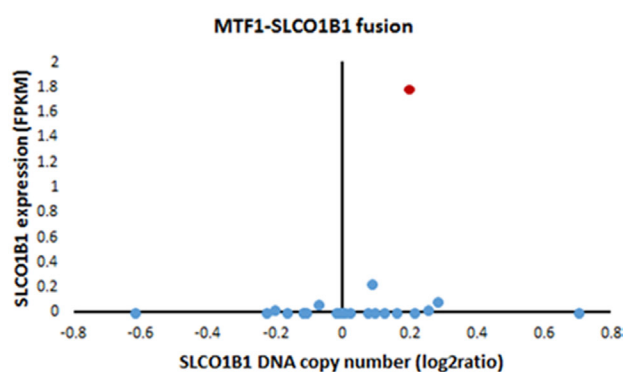

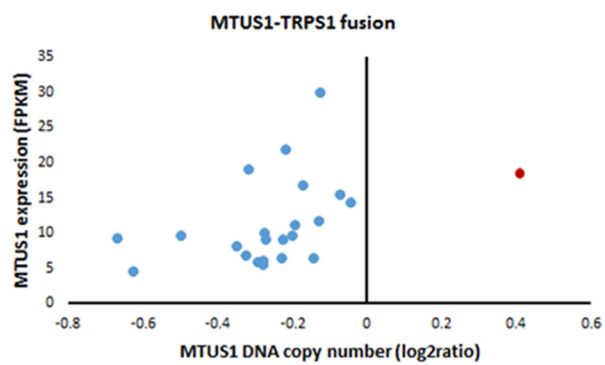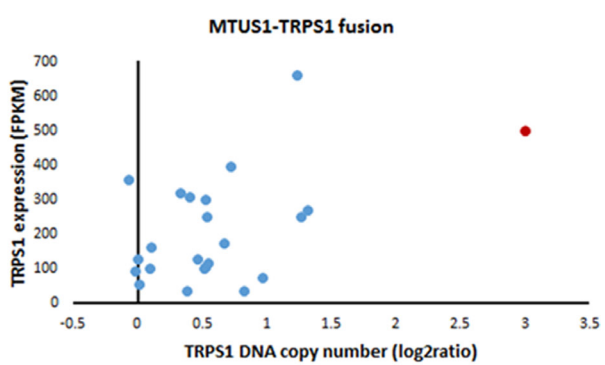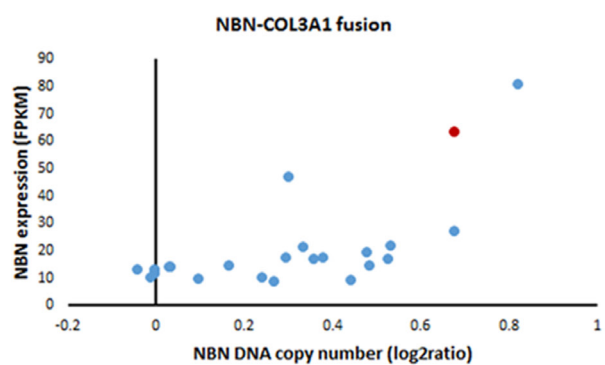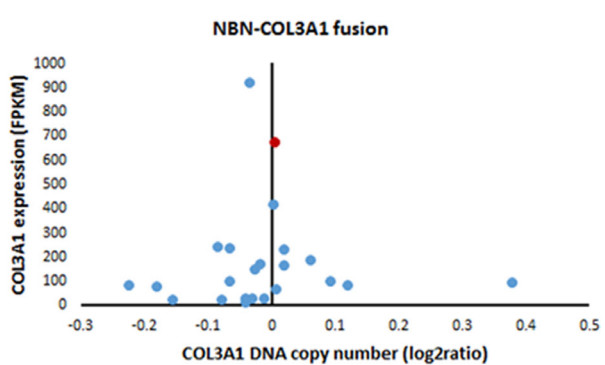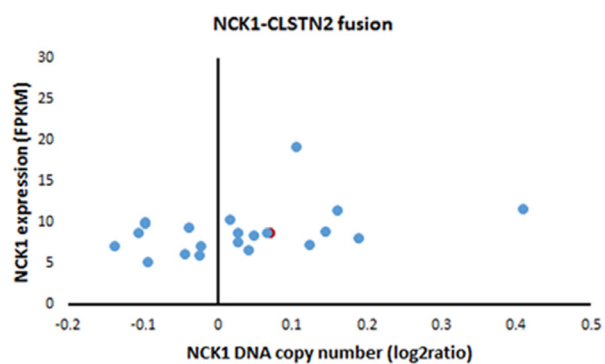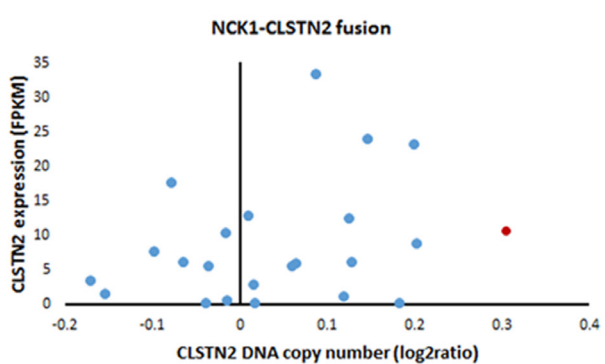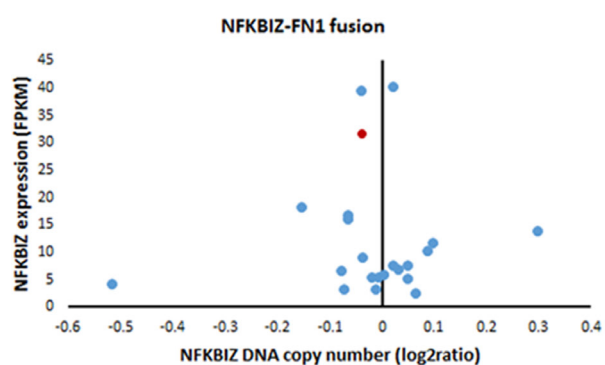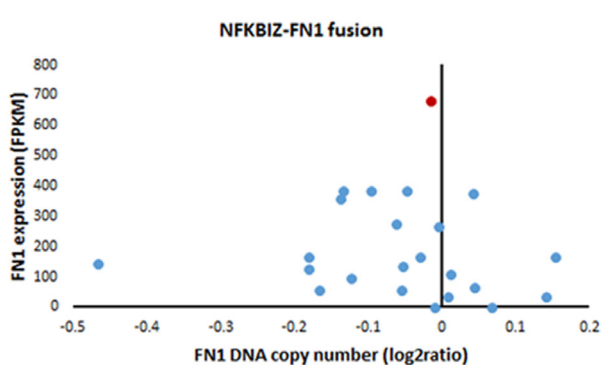

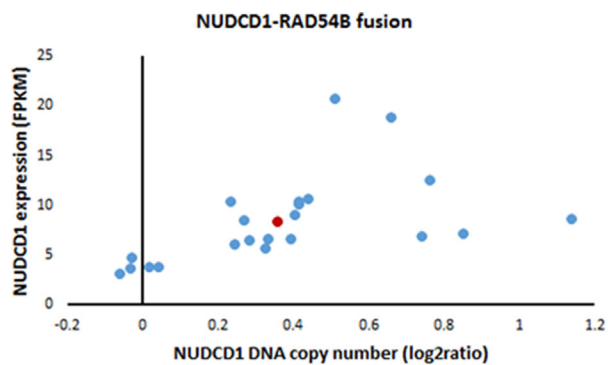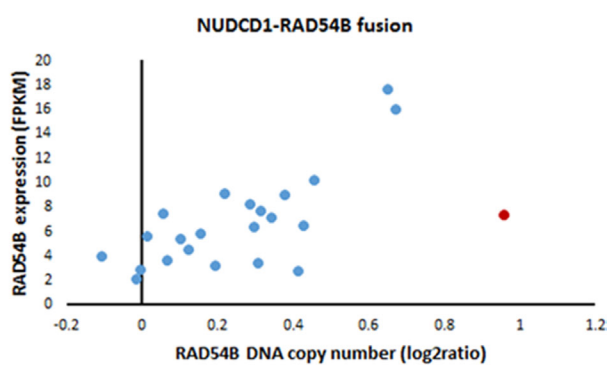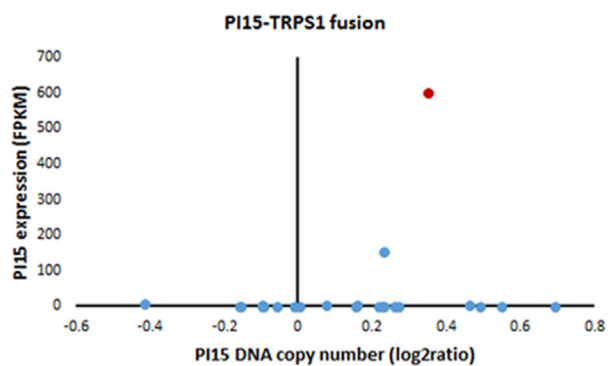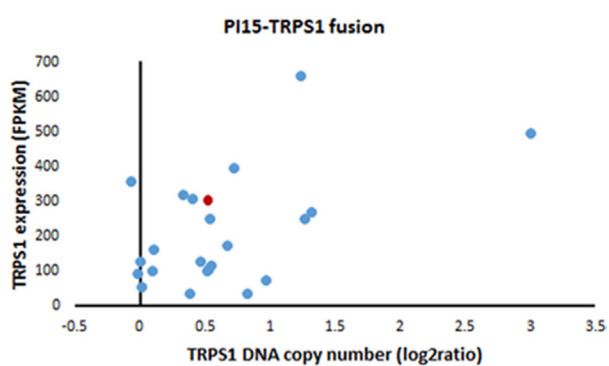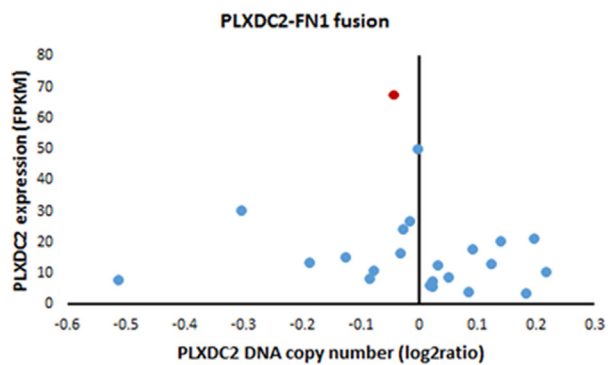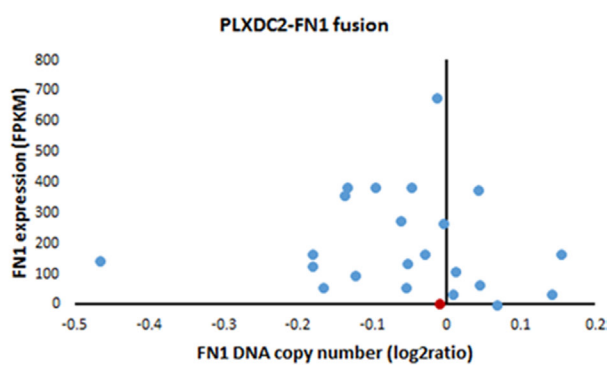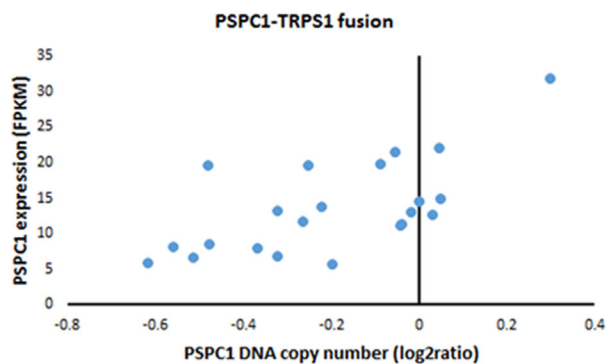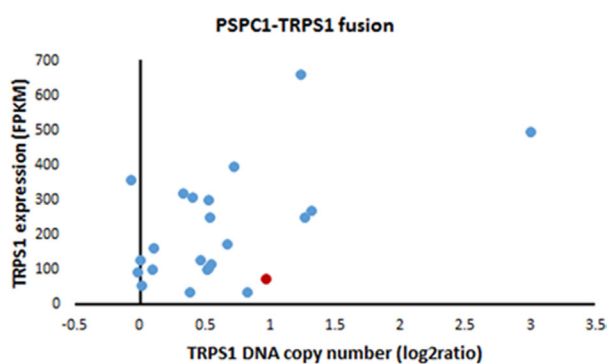

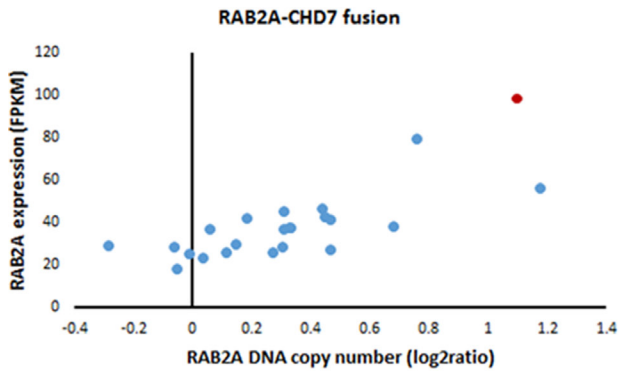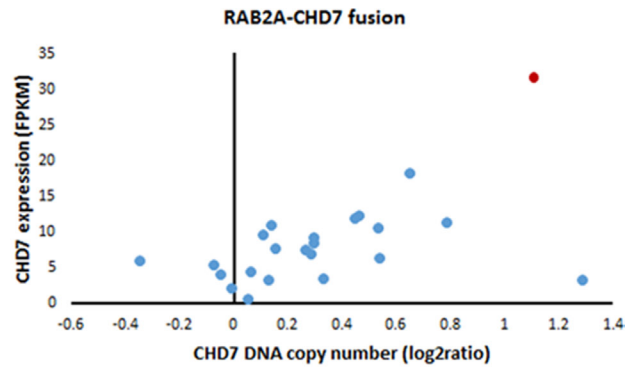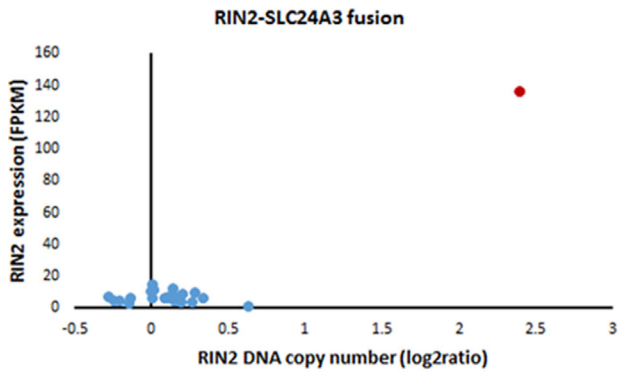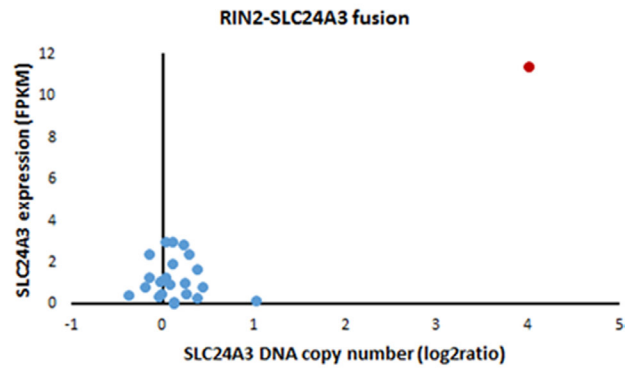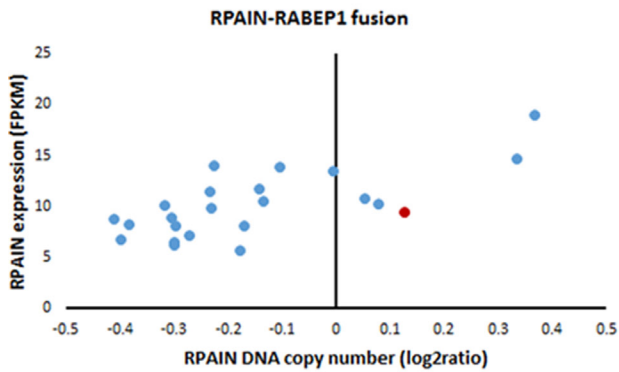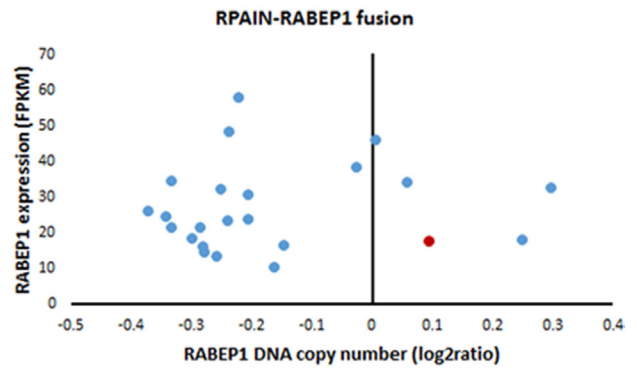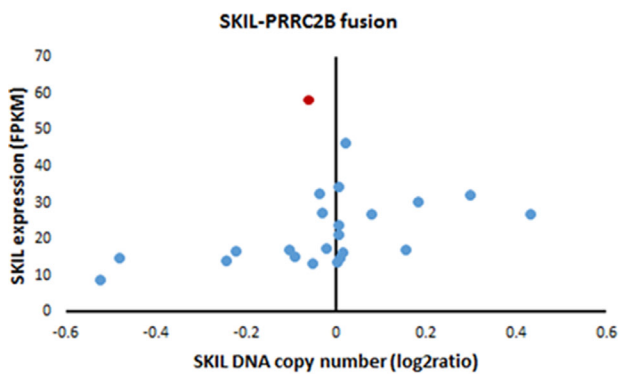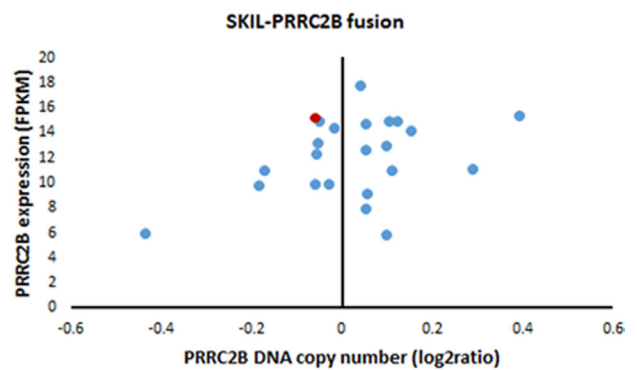

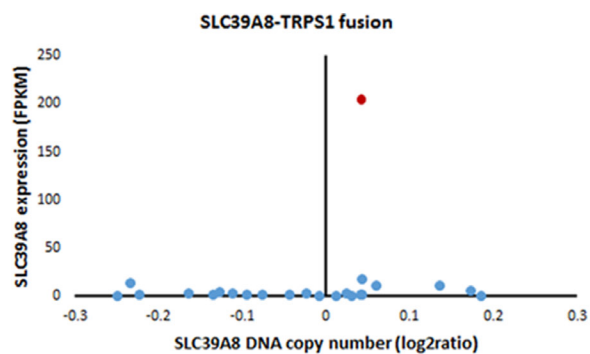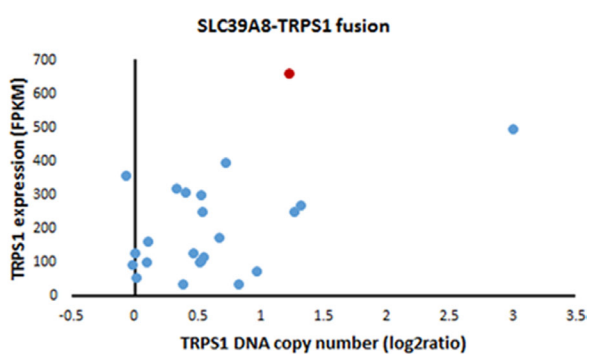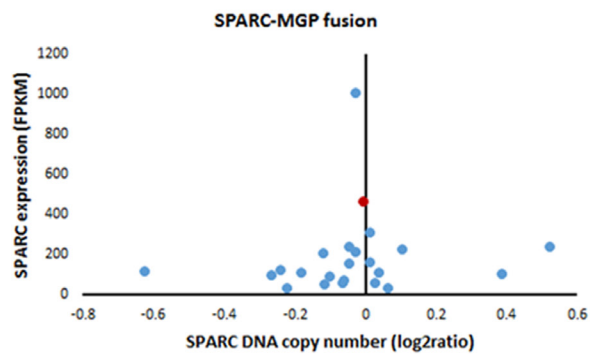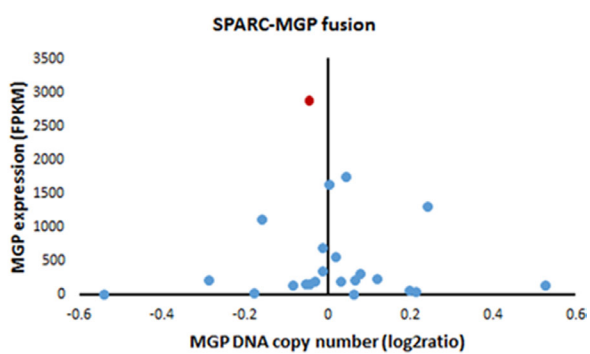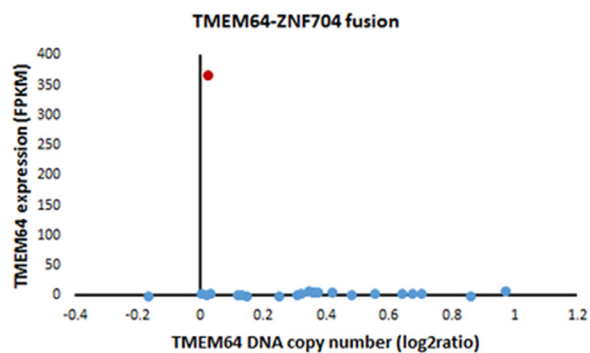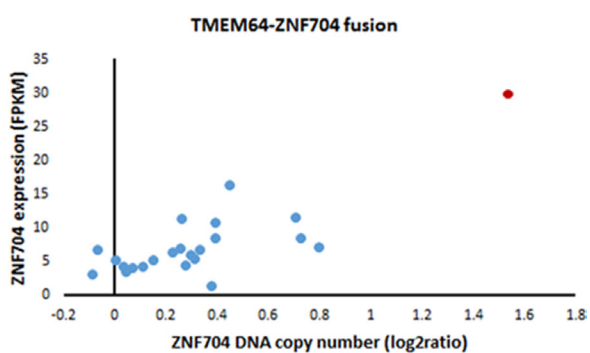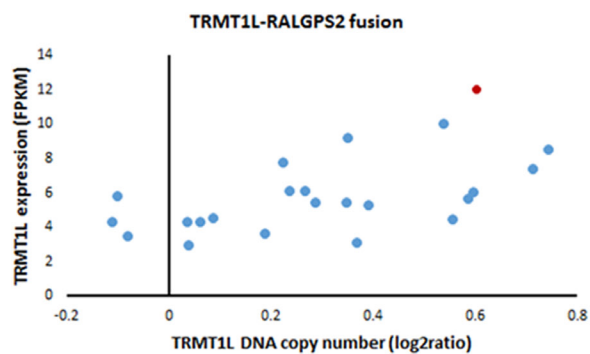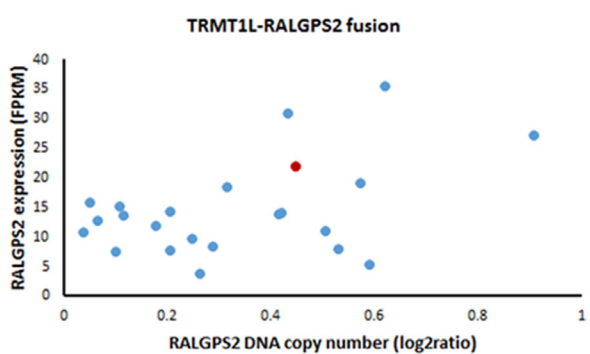

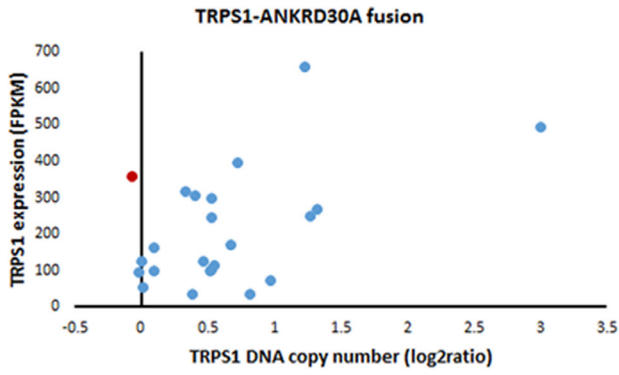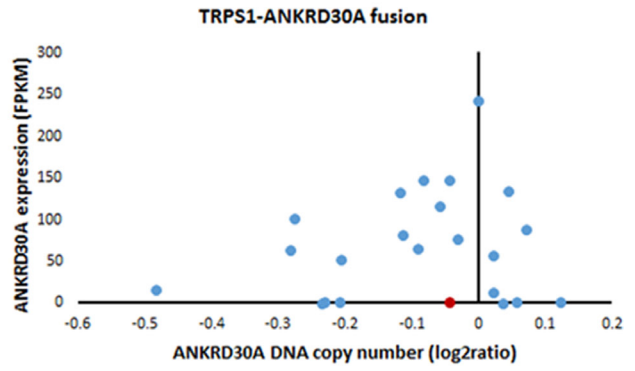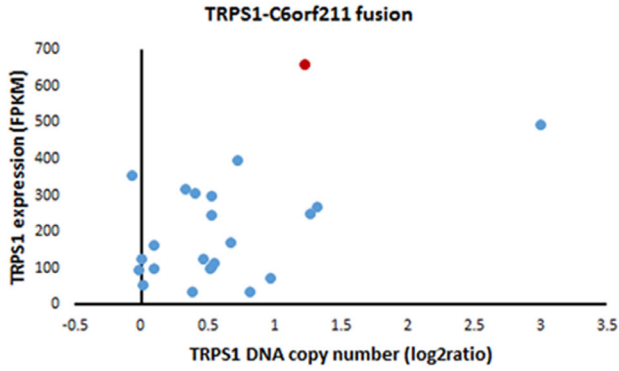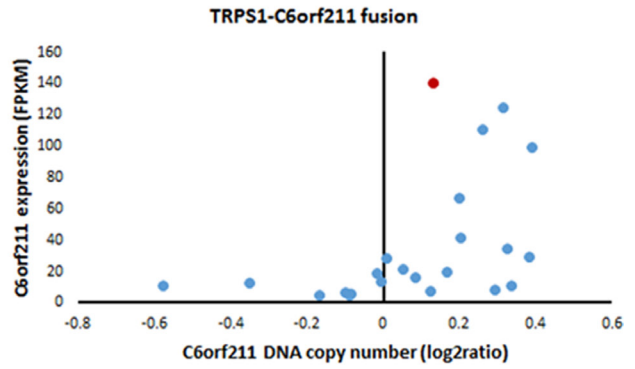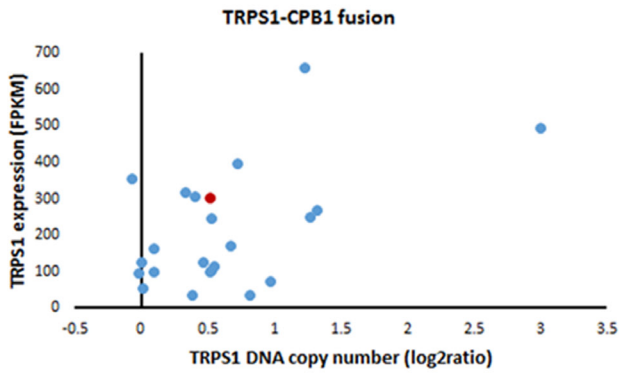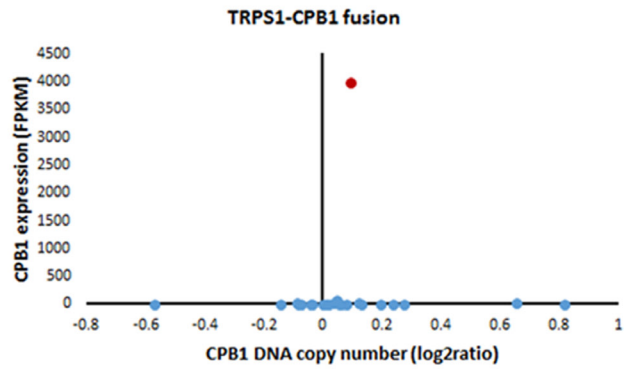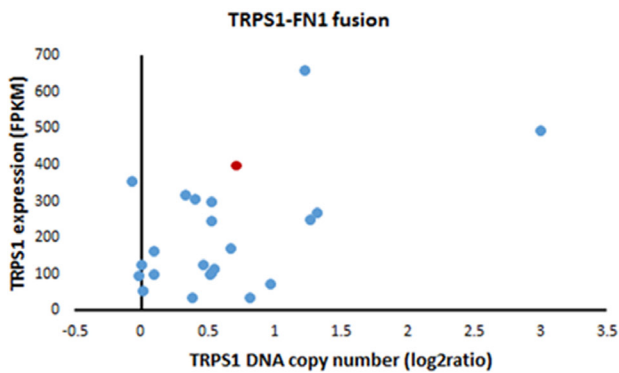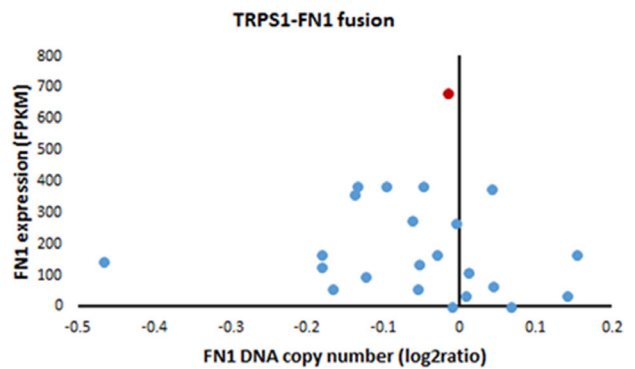

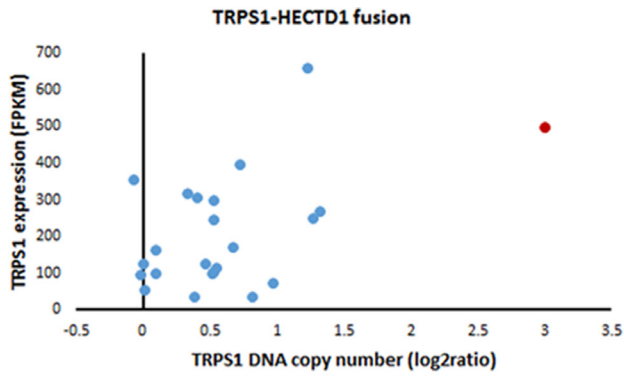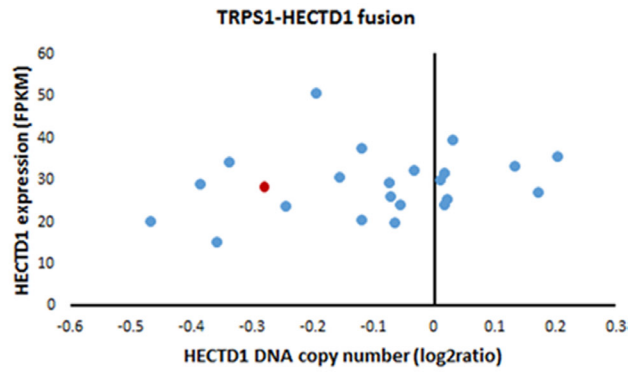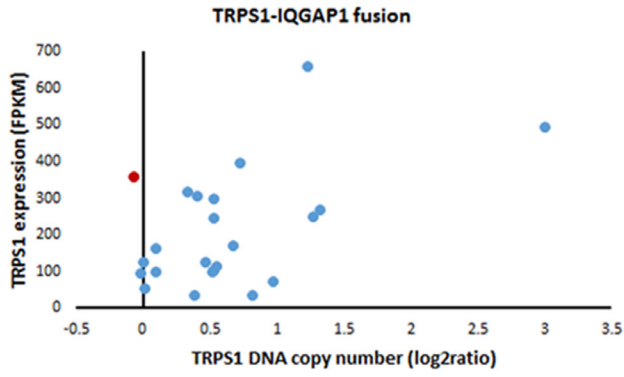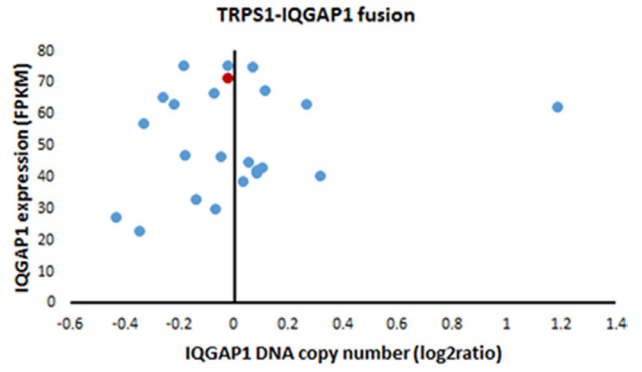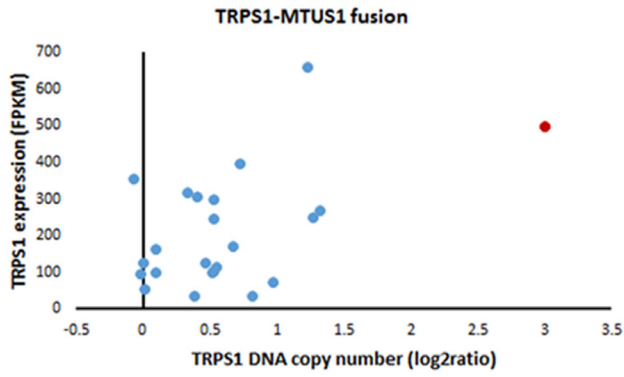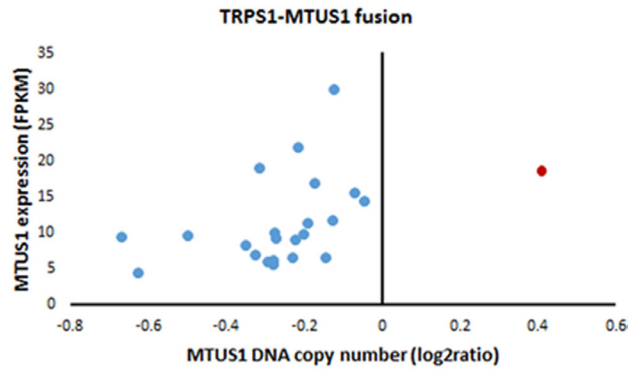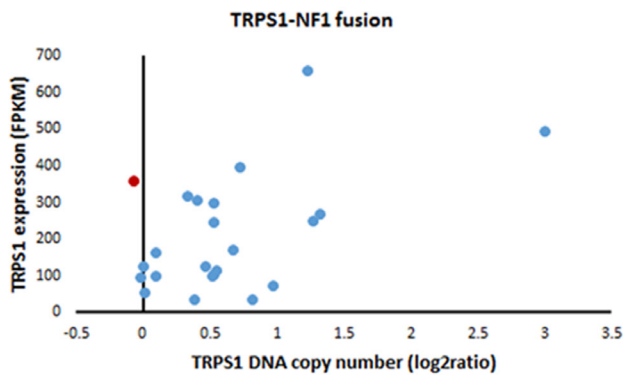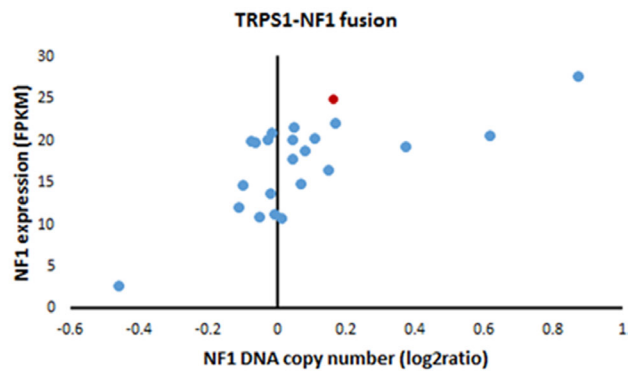



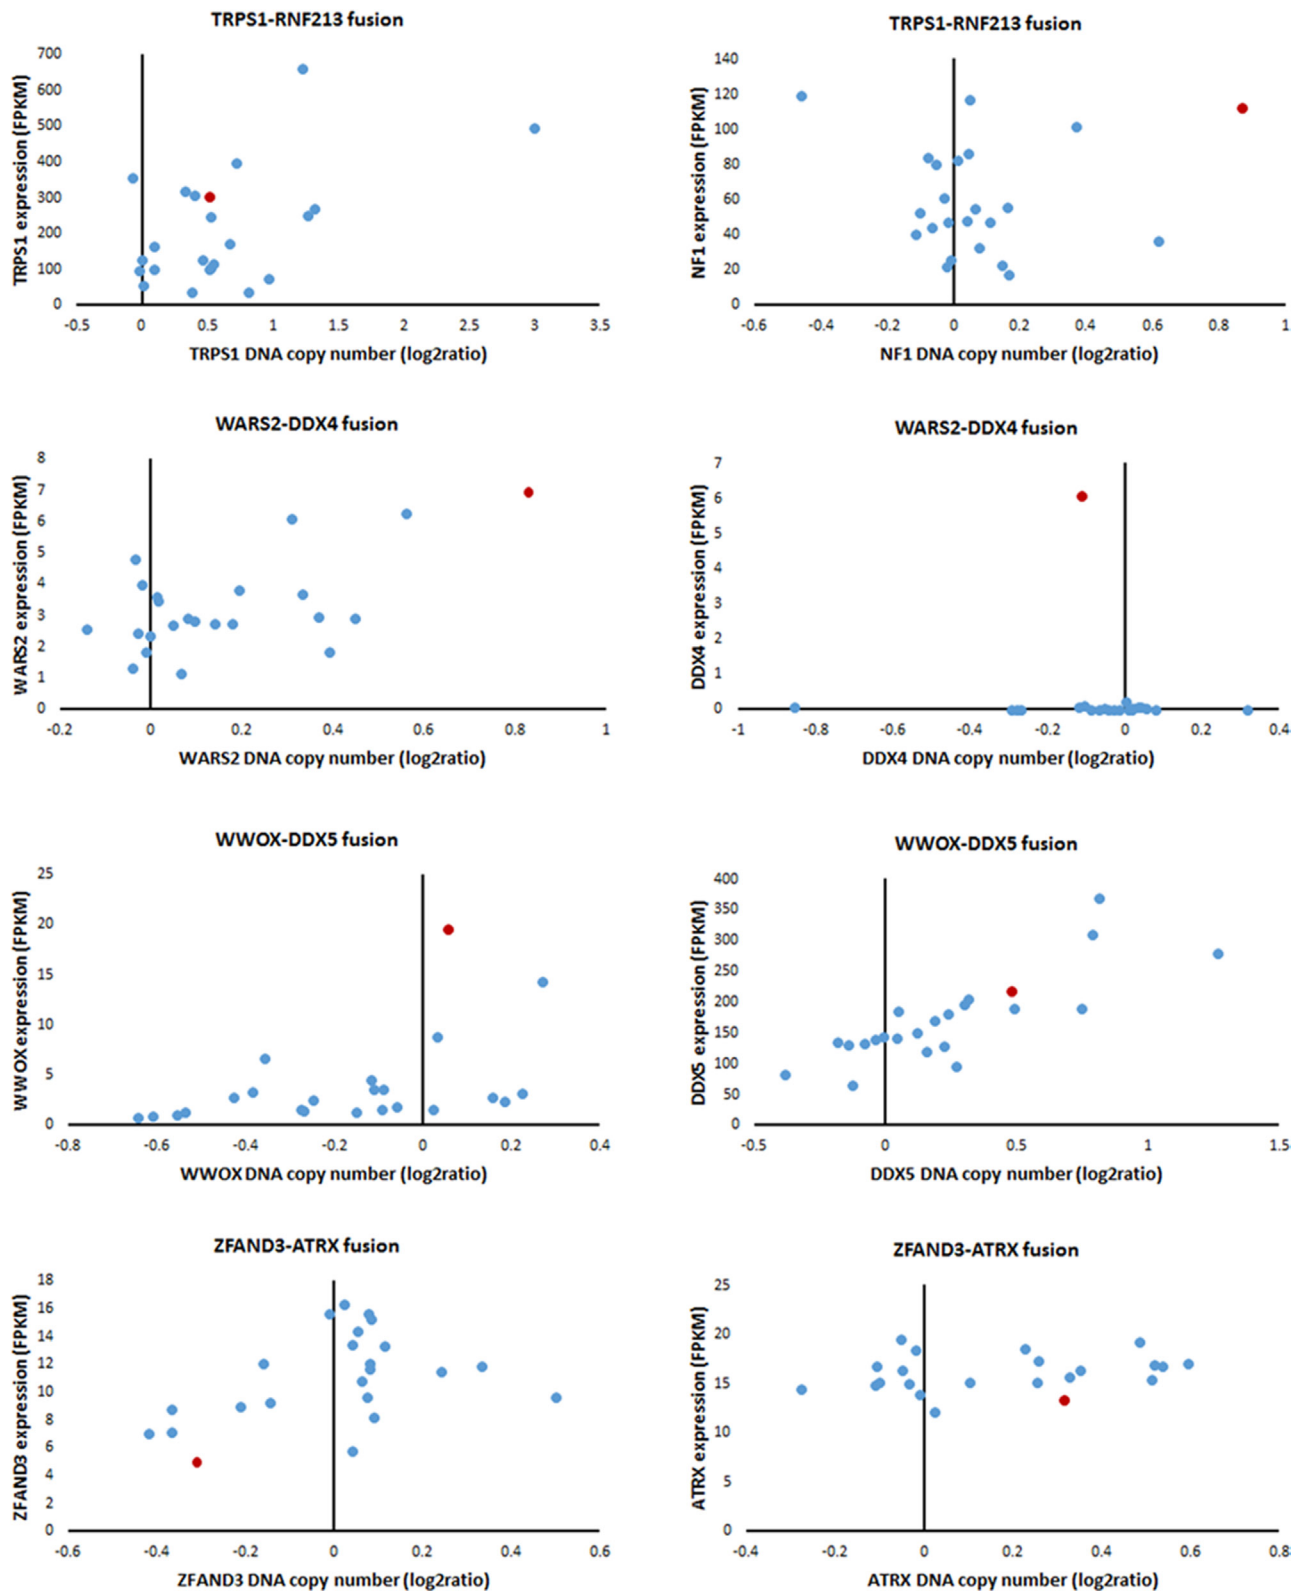

**Supplementary Figure 2: Gene expression patterns for gene fusion partners are frequently unrelated to DNA amplification.** Scatterplots illustrating gene expression levels (FPKM, y-axis) and DNA copy number (log<sub>2</sub>ratio, x-axis) for the 3'- and 5'-gene fusion partners. Red and blue dots depict samples with and without the gene fusion, respectively. DNA amplification is defined as log<sub>2</sub>ratio ≥ 0.5.

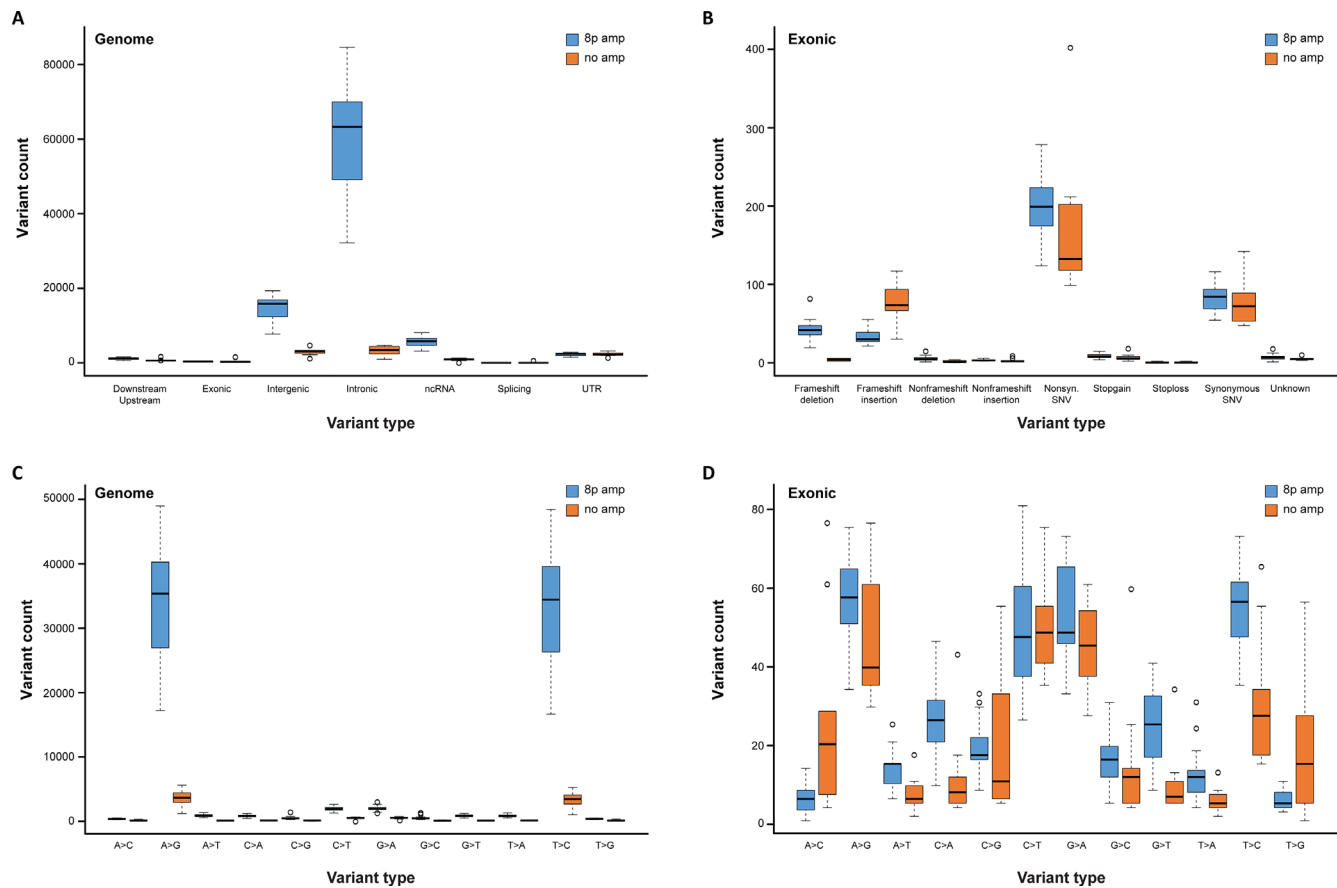

**Supplementary Figure 3: Mutational load is independent of 8p11-p12 amplification status in breast carcinomas.** Box plots illustrating (A–B) the number of genetic variants (y-axis) in genomic and exonic regions (x-axis) for 8p11-p12 amplification (denoted *8p amp*) and the TCGA breast carcinoma samples with neutral 8p11-p12 copy number (denoted *no amp*); and (C–D) the number of base-pair substitutions in genomic and exonic regions (y-axis) and the nucleotide change (x-axis).

**Supplementary Table 1: Chromothripsis-like events identified in breast carcinomas**

| Sample | CTLP region              | Size (Mb) | Cytoband location | CNA status change times | Likelihood ratio (log10) | Cancer genes                                                                                                   |
|--------|--------------------------|-----------|-------------------|-------------------------|--------------------------|----------------------------------------------------------------------------------------------------------------|
| T3010  | chr17:30000001-70000000  | 40.0      | 17q12-q25.1       | 29                      | 22                       | <i>COL1A1, HLF, CLTC, CD79B, DDX5, PRKARIA</i>                                                                 |
| T4296  | chr11:40000001-128827254 | 88.8      | 11p12-q24.3       | 36                      | 13                       | <i>CCND1, PICALM, BIRC3, ATM</i>                                                                               |
| T4672  | chr8:30000001-144142980  | 114.1     | 8p12-q24.3        | 49                      | 12                       | <i>FGFR1, WHSC1L1, HOOK3, EXT1, MYC, NDRG1</i>                                                                 |
| T5578  | chr17:25000001-71944323  | 46.9      | 17q11.2-q25.1     | 20                      | 18                       | <i>COL1A1, HLF, MSI2, CLTC, CD79B, DDX5</i>                                                                    |
| T6061  | chr8:45000001-145338915  | 100.3     | 8p11.1-q24.3      | 42                      | 34                       | <i>NCOA2, HEY1, MYC</i>                                                                                        |
| T7008  | chr6:95000001-144554710  | 49.6      | 6q16.1-q24.2      | 28                      | 11                       | <i>ECT2L, TNFAIP3</i>                                                                                          |
| T7008  | chr17:38774742-78774742  | 40.0      | 17q21.31-q25.3    | 22                      | 8                        | <i>HLF, CLTC, BRIP1, CD79B, PRKARIA</i>                                                                        |
| T7253  | chr8:25000001-65000000   | 40.0      | 8p21.2-q12.3      | 21                      | 13                       | <i>FGFR1, WHSC1L1, WRN</i>                                                                                     |
| T7253  | chr11:50000001-90000000  | 40.0      | 11p11.12-q14.3    | 21                      | 13                       | <i>CCND1, NUMA1, PICALM</i>                                                                                    |
| T7396  | chr17:15000001-77435964  | 62.4      | 17p12-q25.3       | 41                      | 15                       | <i>HLF, CLTC, BRIP1, CD79B, DDX5, PRKARIA, CANT1</i>                                                           |
| T7396  | chr20:30000001-60000000  | 30.0      | 20q11.21-q13.33   | 21                      | 10                       | <i>TOP1, GNAS</i>                                                                                              |
| T7670  | chr6:5000001-119142980   | 114.1     | 6p25.1-q22.31     | 41                      | 9                        | <i>DEK, HIST1H41, POU5F1, FANCE, PRDM1</i>                                                                     |
| T7670  | chr17:10000001-72435964  | 62.4      | 17p13.1-q25.2     | 28                      | 8                        | <i>CDK12, ERBB2, LASP1, MLLT6</i>                                                                              |
| T7678  | chr11:30000001-93811651  | 63.8      | 11p14.1-q21       | 31                      | 25                       | <i>CCND1, NUMA1, CREB3L1, DDB2, PICALM</i>                                                                     |
| T7682  | chr1:46017107-245522847  | 199.5     | 1p34.1-q44        | 41                      | 9                        | <i>BCL9, ARNT, MUC1, NTRK1, PRCC, SDHC, MDM4, ELK4, SLC45A3, H3F3A, FH, FUBP1, FAM46C</i>                      |
| T7682  | chr11:10000001-124142980 | 114.1     | 11p15.4-q24.2     | 40                      | 17                       | <i>CCND1, NUMA1, PICALM, MAML2, ATM, BIRC3, DDX10, POU2AF1, SDHD, ARHGEF12, CBL, DDX6</i>                      |
| T7807  | chr6:60000001-136117153  | 76.1      | 6p11.1-q23.3      | 40                      | 14                       |                                                                                                                |
| T8009  | chr8:85000001-131944323  | 46.9      | 8q21.2-q24.22     | 30                      | 12                       | <i>COX6C, MYC</i>                                                                                              |
| T8009  | chr11:55677642-134452384 | 78.8      | 11q11-q25         | 33                      | 9                        | <i>CCND1, NUMA1, PICALM, MAML2, ATM, BIRC3, DDX10, POU2AF1, SDHD, ARHGEF12, CBL, DDX6, FLII</i>                |
| T8038  | chr11:45000001-133827254 | 88.8      | 11p11.2-q25       | 20                      | 20                       | <i>CCND1</i>                                                                                                   |
| T8041  | chr17:15000001-77435964  | 62.4      | 17p12-q25.3       | 38                      | 28                       | <i>SUZ12, CDK12, ERBB2, HLF, MSI2, CLTC, BRIP1, PRKARIA, BRCA1, ETV4, RARA, CANT1</i>                          |
| T8277  | chr1:1-243018229         | 243.0     | 1p36.33-q44       | 48                      | 36                       | <i>MUTYH, JUN, JAK1, FUBP1, NOTCH2, PDE4DIP, BCL9, ARNT, MUC1, NTRK1, PRCC, SDHC, TPR, MDM4, ELK4, SLC45A3</i> |
| T8359  | chr10:40000001-102435964 | 62.4      | 10p11.1-q24.31    | 22                      | 22                       | <i>CCDC6</i>                                                                                                   |
| T8376  | chr11:20000001-126368585 | 106.4     | 11p15.1-q24.2     | 33                      | 19                       | <i>CCND1, PAFAH1B2, PCSK7, PICALM, BIRC3, MAML2, ATM, DDX10, POU2AF1, SDHD, ARHGEF12, CBL, DDX6</i>            |
| T8456  | chr11:30000001-130338915 | 100.3     | 11p14.1-q25       | 30                      | 16                       | <i>CCND1, EXT2, PICALM, MAML2, ATM, DDX10, POU2AF1, SDHD</i>                                                   |
| T8491  | chr17:15000001-77435964  | 62.4      | 17p12-q25.3       | 27                      | 29                       | <i>CDK12, ERBB2, LASP1, MLLT6, ETV4, MSI2, CLTC, BRIP1, CD89B, PRKARIA</i>                                     |
| T8804  | chr6:1-170975699         | 171.0     | 6p25.3-q27        | 49                      | 10                       |                                                                                                                |
| T8828  | chr6:75000001-163827254  | 88.8      | 6q13-q26          | 41                      | 9                        | <i>PRDM1, GOPC, ROS1, ECT2L, MYB, TNFAIP3, EZR</i>                                                             |
| T8842  | chr1:139154262-245522847 | 106.4     | 1q12-q44          | 20                      | 19                       | <i>MDM4, ELK4, SLC45A3, FH</i>                                                                                 |

|        |                          |       |                |    |    |                                                                                                           |
|--------|--------------------------|-------|----------------|----|----|-----------------------------------------------------------------------------------------------------------|
| T8860  | chr11:2002573-134452384  | 132.5 | 11p15.5-q25    | 36 | 10 | CCND1, NUMA1, PICALM, MAML2, ATM, BIRC3, DDX10, POU2AF1, SDHD, PAFAH1B2, PCSK7, ARHGEF12, CBL, DDX6, FLII |
| T8931  | chr4:125000001-174554710 | 49.6  | 4q28.1-34.1    | 29 | 18 | FBXW7                                                                                                     |
| T8931  | chr11:15000001-61944323  | 46.9  | 11p15.2-q12.3  | 21 | 10 | FANCF                                                                                                     |
| T8977  | chr6:85000001-148811651  | 63.8  | 6q14.3-q24.3   | 36 | 26 | PRDM1                                                                                                     |
| T9042  | chr11:30000001-93811651  | 63.8  | 11p14.1-q21    | 22 | 21 | CCND1, PICALM                                                                                             |
| T9086  | chr7:1-100338915         | 100.3 | 7p22.3-q22.1   | 34 | 31 | CARD11, PMS2, ETV1, HNRNPA2B1, HOXA11, HOXA13, HOXA9, AKAP9, CDK6                                         |
| T9494  | chr17:38774742-78774742  | 40.0  | 17q21.31-q25.3 | 22 | 8  | MSI2, CLTC, BRIP1, CD79B, DDX5, PRKARIA, ASPSCR1                                                          |
| T9612  | chr11:25000001-125338915 | 100.3 | 11p14.3-q24.2  | 20 | 9  | CCND1, PAFAH1B2, PCSK7                                                                                    |
| T9632  | chr1:145000001-245338915 | 100.3 | 1q21.1-q44     | 34 | 10 | ARNT, TPM3, PRCC, SDHC, PBX1, ABL2, TPR, ELK4, MDM4, SLC45A3, H3F3A, FH                                   |
| T9769  | chr11:65000001-95000000  | 30.0  | 11q13.1-q21    | 20 | 12 | CCND1                                                                                                     |
| T9806  | chr11:15000001-91117153  | 76.1  | 11p15.2-q14.3  | 21 | 21 | EXT2, PICALM                                                                                              |
| T10400 | chr11:10000001-124142980 | 114.1 | 11p15.4-q24.2  | 44 | 14 | CCND1, PAFAH1B2, PCSK7, WTI, NUMA1, PICALM, MAML2, BIRC3, ATM, DDX10, POU2AF1, SDHD, DDX6, CBL, ARHGEF12  |
| T10457 | chr11:25000001-131368585 | 106.4 | 11p14.3-q25    | 21 | 22 | CCND1, NUMA1                                                                                              |
| T10737 | chr12:20000001-82435964  | 62.4  | 12p12.2-q21.31 | 21 | 20 | MDM2                                                                                                      |
| T10823 | chr8:7845558-146274826   | 138.4 | 8p23.1-q24.3   | 73 | 14 | PCMI, HOOK3, TCEA1, CHCHD7, PLAG1, NCOA2, EXT1, MYC, WRN, WHSC1L1, NDRG1                                  |
| T10823 | chr17:15000001-77435964  | 62.4  | 17p12-q25.3    | 46 | 13 | MSI2, CLTC, BRIP1, CD79B, DDX5, PRKARIA, CANT1, NF1, RAF15, CDK12, ERBB2, RARA                            |
| T10900 | chr19:1375687-63811651   | 62.4  | 19p13.3-q13.43 | 40 | 8  | MLL1, SH3GL1, DNM2, SMARCA4, BRD4, TPM4, JAK3, ELL, CEBPA, AKT2, BCL3, CBLC, ERCC2, KLK2, TFPT            |
| T10904 | chr11:35000001-97435964  | 62.4  | 11p13-q22.1    | 31 | 35 | MEN1, CCND1, PICALM                                                                                       |
| T11239 | chr2:1-243018229         | 243.0 | 2p25.3-q37.3   | 95 | 28 | ACSL3                                                                                                     |
| T11248 | chr11:40000001-128827254 | 88.8  | 11p12-q24.3    | 25 | 14 | CCND1, NUMA1, PICALM, ATM, BIRC3, DDX10, MAML2, POU2AF1, SDHD, ARHGEF12, CBL, DDX6, FLII                  |
| T11292 | chr1:105000001-243429268 | 138.4 | 1p21.1-q44     | 39 | 8  | FAM46C, NOTCH2, TPE4DIP, BCL9, ARNT, NTRK1, PRCC, SDHC, PBX1, ABL2, TPR, MDM4, ELK4, SLC45A3, H3F3A, FH   |
| T11314 | chr8:60000001-136117153  | 76.1  | 8q12.1-q24.22  | 37 | 9  | EXT1, MYC                                                                                                 |
| T11315 | chr8:75000001-137435964  | 62.4  | 8q21.11-q24.23 | 28 | 9  | HEY1, EXT1, MYC, NDRG1                                                                                    |
| T11378 | chr17:2657589-78774742   | 76.1  | 17p13.3-q25.3  | 33 | 11 | SUZ12, CDK12, ERBB2, COL1A1, HLF, MSI2, BRIP1, CLTC, CD79B, DDX5, PRKARIA, CANT1                          |
| T11633 | chr11:55000001-85000000  | 30.0  | 11q11-q14.1    | 22 | 11 | CCND1                                                                                                     |
| T11659 | chr8:30000001-144142980  | 114.1 | 8p12-q24.3     | 44 | 8  | FGFR1, WHSC1L1, HOOK3, TCEA1, CHCHD7, PLAG1, NCOA2, HEY1, COX6C, EXT1, MYC, NDRG1, WRN                    |
| T11742 | chr8:85000001-131944323  | 46.9  | 8q21.2-q24.22  | 27 | 28 | MYC                                                                                                       |
| T11742 | chr11:2002573-134452384  | 132.5 | 11p15.5-q25    | 39 | 22 | LMO2, FLII                                                                                                |
| T11881 | chr11:20000001-126368585 | 106.4 | 11p15.1-q24.2  | 29 | 19 | CCND1, PAFAH1B2, PCSK7                                                                                    |

## Supplementary Table 2: Recurrent regions of amplification within the 8p11-p12 amplicon

Current study (*n* = 47)

| Amplicon Peak | Region                 | Size (kb) | Cytoband Location | Genes mapped to region                                   | Number of genes | Frequency % | % of CNV overlap | <i>P</i> -value |
|---------------|------------------------|-----------|-------------------|----------------------------------------------------------|-----------------|-------------|------------------|-----------------|
| P1            | chr8:34334337-34443082 | 108.7     | 8p12              |                                                          | 0               | 30          | 0                | 0               |
| P2            | chr8:37351420-37571832 | 220.4     | 8p12              |                                                          | 0               | 72          | 16               | 0               |
| P3            | chr8:37676135-37899290 | 223.2     | 8p12              | <i>ERLIN2, LOC728024, PROSC, GPR124, BRF2, RAB11FIP1</i> | 6               | 72          | 2                | 0               |
| P4            | chr8:38260728-38328670 | 67.9      | 8p12              | <i>WHSC1L1</i>                                           | 1               | 74          | 0                | 0               |
| P5            | chr8:38498119-38729433 | 231.3     | 8p12 - p11.23     | <i>C8orf86, RNF5P1, TACC1</i>                            | 3               | 72          | 64               | 0               |
| P6            | chr8:40184216-40278522 | 94.3      | 8p11.21           |                                                          | 0               | 53          | 5                | 0               |
| P7            | chr8:40780622-40960961 | 180.3     | 8p11.21           | <i>ZMAT4</i>                                             | 1               | 49          | 0                | 0               |
| P8            | chr8:41752765-41793948 | 41.2      | 8p11.21           | <i>ANK1</i>                                              | 1               | 47          | 0                | 0               |
| P9            | chr8:42099873-42477259 | 377.4     | 8p11.21           | <i>AP3M2, PLAT, IK8K8, POLB, DKK4, VDAC3, SLC20A2</i>    | 7               | 43          | 8                | 0               |

**Supplementary Table 3: Bacterial artificial chromosomes (BACs) used in the FISH experiments**

| BAC clone    | Gene(s) name                             | Start (bp) | End (bp) | Size (bp) | Band              |
|--------------|------------------------------------------|------------|----------|-----------|-------------------|
| RP11-380B11  | <i>FKSG2;KCNU1</i>                       | 36836720   | 37003025 | 166306    | 8p12              |
| RP11-745K6   | <i>KCNU1</i>                             | 36911752   | 37077533 | 165782    | 8p12              |
| RP11-371M15  | <i>NULL</i>                              | 36980612   | 37176230 | 195619    | 8p12              |
| RP11-95I18   | <i>NULL</i>                              | 37153188   | 37307820 | 154633    | 8p12              |
| RP11-527N22  | <i>NULL</i>                              | 37193796   | 37395020 | 201225    | 8p12              |
| RP11-621B1   | <i>NULL</i>                              | 37365132   | 37518160 | 153029    | 8p12              |
| RP13-631H19  | <i>NULL</i>                              | 37399410   | 37535863 | 136454    | 8p12              |
| RP11-332C8   | <i>LOC157860</i>                         | 37418780   | 37607801 | 189022    | 8p12              |
| RP11-319J12  | <i>LOC157860;FLJ14299</i>                | 37481145   | 37696334 | 215190    | 8p12              |
| RP13-509O17  | <i>LOC157860</i>                         | 37517260   | 37655936 | 138677    | 8p12              |
| RP13-620O23  | <i>LOC157860;FLJ14299</i>                | 37560498   | 37710298 | 149801    | 8p12              |
| CTD-2015B18  | <i>SPFH2;FLJ14299</i>                    | 37626978   | 37730745 | 103768    | 8p12              |
| RP13-580P15  | <i>SPFH2;PROSC;GPR124</i>                | 37718514   | 37794138 | 75625     | 8p12              |
| RP11-168H8   | <i>BRF2;SPFH2;PROSC;GPR124;RAB11FIP1</i> | 37720525   | 37874916 | 154392    | 8p12              |
| CTD-2225N15  | <i>MGC33309;BRF2;GPR124;RAB11FIP1</i>    | 37790755   | 37923664 | 132910    | 8p12              |
| RP11-156L3   | <i>MGC33309;EIF4EBP1;ADRB3;RAB11FIP1</i> | 37852536   | 38058325 | 205790    | 8p12              |
| RP11-594D10  | <i>EIF4EBP1;ASH2L;ADRB3</i>              | 37934266   | 38102965 | 168700    | 8p12              |
| RP11-389E22  | <i>EIF4EBP1;STAR;ASH2L;BAG4;LSM1</i>     | 38035380   | 38189049 | 153670    | 8p12              |
| RP11-601G22  | <i>DDHD2;WHSC1L1;BAG4;LSM1;HTPAP</i>     | 38128912   | 38295034 | 166123    | 8p12              |
| RP11-636F12  | <i>DDHD2;WHSC1L1;BAG4;HTPAP</i>          | 38168966   | 38329500 | 160535    | 8p12              |
| CTD-2385A20  | <i>DDHD2;WHSC1L1;HTPAP</i>               | 38209555   | 38298495 | 88941     | 8p12              |
| RP11-350N15  | <i>LETM2;WHSC1L1;FLJ43582;FGFR1</i>      | 38289075   | 38488995 | 199921    | 8p12              |
| RP11-148D21  | <i>LETM2;WHSC1L1;FLJ43582;FGFR1</i>      | 38307871   | 38507244 | 199374    | 8p12 - 8p11.23    |
| RP11-359P11  | <i>FLJ43582;FGFR1</i>                    | 38427815   | 38603011 | 175197    | 8p12 - 8p11.23    |
| RP11-675F6   | <i>FLJ43582</i>                          | 38463692   | 38632874 | 169183    | 8p12 - 8p11.23    |
| RP11-734M8   | <i>NULL</i>                              | 38529206   | 38697350 | 168145    | 8p11.23           |
| RP11-495O10  | <i>NULL</i>                              | 38549335   | 38761516 | 212182    | 8p11.23           |
| RP11-794F5   | <i>TACCC1</i>                            | 38593558   | 38776969 | 183412    | 8p11.23           |
| RP11-690P9   | <i>TACCC1</i>                            | 38640388   | 38776969 | 136582    | 8p11.23           |
| RP11-732D22  | <i>TACCC1;PLEKHA2</i>                    | 38725911   | 38893939 | 168029    | 8p11.23           |
| CTD-2544N14  | <i>ADAM9;HTRA4;PLEKHA2;BLP1</i>          | 38871774   | 39070960 | 199187    | 8p11.23           |
| RP11-742F8   | <i>ADAM9;HTRA4;PLEKHA2;BLP1;ADAM32</i>   | 38922348   | 39109975 | 187628    | 8p11.23           |
| RP11-391D11  | <i>ADAM9;HTRA4;BLP1;ADAM32</i>           | 38954288   | 39152222 | 197935    | 8p11.23           |
| RP11-742H5   | <i>ADAM9;ADAM32</i>                      | 39053922   | 39235325 | 181404    | 8p11.23           |
| CTD-2172C13  | <i>ADAM5;ADAM32</i>                      | 39186741   | 39349390 | 162650    | 8p11.23           |
| RP11-583G7   | <i>ADAM5;ADAM32</i>                      | 39221703   | 39398472 | 176770    | 8p11.23           |
| RP11-33N21   | <i>FLJ30656;ADAM3A</i>                   | 39420279   | 39553850 | 133572    | 8p11.23 - 8p11.22 |
| RP11-1152G18 | <i>ADAM18</i>                            | 39510564   | 39647698 | 137135    | 8p11.22           |
| RP11-769N8   | <i>ADAM18</i>                            | 39541437   | 39717022 | 175586    | 8p11.22           |
| RP11-676B15  | <i>NULL</i>                              | 39569848   | 39628893 | 59046     | 8p11.22           |
| RP11-648J12  | <i>ADAM2;ADAM18</i>                      | 39587562   | 39768413 | 180852    | 8p11.22           |
| RP11-143C18  | <i>ADAM2;ADAM18</i>                      | 39644486   | 39797061 | 152576    | 8p11.22           |
| RP11-44K6    | <i>LOC169355;INDO</i>                    | 39836599   | 39985605 | 149007    | 8p11.22 - 8p11.21 |
| RP11-157N22  | <i>NULL</i>                              | 39810942   | 40004703 | 193762    | 8p11.22 - 8p11.21 |
| RP11-719N14  | <i>C8orf4;LOC169355</i>                  | 39973683   | 40163169 | 189487    | 8p11.21           |
| RP11-508J20  | <i>C8orf4</i>                            | 40056046   | 40205264 | 149219    | 8p11.21           |

|              |          |           |           |        |                   |
|--------------|----------|-----------|-----------|--------|-------------------|
| CTD-2170K14  | NULL     | 40146465  | 40212249  | 65785  | 8p11.21           |
| RP11-104D16  | NULL     | 40154516  | 40344796  | 190281 | 8p11.21           |
| RP11-812C6   | NULL     | 40275993  | 40464496  | 188504 | 8p11.21           |
| RP11-108H10  | FLJ13842 | 40395268  | 40567036  | 171769 | 8p11.21           |
| RP11-51K12   | FLJ13842 | 40501065  | 40649254  | 148190 | 8p11.21           |
| RP11-592B24  | NULL     | 40583114  | 40764962  | 181849 | 8p11.21           |
| RP11-749P1   | NULL     | 40620821  | 40796283  | 175463 | 8p11.21           |
| RP11-284J3   | NULL     | 40666764  | 40830435  | 163672 | 8p11.21           |
| RP11-465K16  | FLJ13842 | 40778859  | 40972561  | 193703 | 8p11.21           |
| RP11-167P2   | FLJ13842 | 40787605  | 40949362  | 161758 | 8p11.21           |
| RP11-681J6   | NULL     | 40916540  | 41110713  | 194174 | 8p11.21           |
| CTD-2035O24  | SFRP1    | 41110715  | 41238819  | 128105 | 8p11.21           |
| RP11-642F7   | MALAT1   | 65266462  | 65429053  | 162591 | 11q13.1           |
| RP11-1104L6  | MALAT1   | 65200229  | 65378762  | 178533 | 11q13.1           |
| RP11-472D15  | MALAT1   | 65264768  | 65455761  | 190993 | 11q13.1           |
| CTD-2240J20  | AHNAK    | 62191334  | 62336912  | 145578 | 11q12.3           |
| RP11-466M24  | TRPS1    | 116341665 | 116522802 | 181137 | 8q23.3            |
| RP11-762A3   | TRPS1    | 116485587 | 116668671 | 183084 | 8q23.3            |
| RP11-794B13  | FOXP1    | 71180816  | 71356061  | 175245 | 3p13              |
| RP11-905F6   | FOXP1    | 71256411  | 71475547  | 219136 | 3p13              |
| RP11-109G20  | FOXP1    | 71027347  | 71179919  | 152572 | 3p13              |
| RP11-1127D11 | FOXP1    | 71429509  | 71572956  | 143447 | 3p13              |
| RP11-69L8    | FOXP1    | 71572153  | 71733818  | 161665 | 3p13              |
| RP11-113M16  | RPPHI    | 20794573  | 20979309  | 184736 | 14q11.2           |
| RP11-147O12  | LRBA     | 151439748 | 151578761 | 139013 | 4q31.3            |
| RP11-156N13  | LRBA     | 151158076 | 151334332 | 176256 | 4q31.3            |
| RP11-833H23  | LRBA     | 151273194 | 151442964 | 169770 | 4q31.3            |
| RP11-265A4   | LRBA     | 151499319 | 151674156 | 174837 | 4q31.3            |
| RP11-28E24   | LRBA     | 151627684 | 151771649 | 143965 | 4q31.3            |
| RP11-465P24  | LRBA     | 151736644 | 151899786 | 163142 | 4q31.3            |
| RP11-125M5   | LRBA     | 151832217 | 152014630 | 182413 | 4q31.3            |
| RP11-591L23  | SLC39A6  | 33683777  | 33866984  | 183207 | 18q12.2           |
| RP11-592J1   | ANKRD30A | 37294438  | 37461431  | 166993 | 10p11.21          |
| RP11-264O24  | ANKRD30A | 37294438  | 37461431  | 166993 | 10p11.21          |
| RP11-81D7    | DDX5     | 62460761  | 62636156  | 175395 | 17q23.3 - 17q24.1 |
| RP11-661B17  | CLTC     | 57651039  | 57855337  | 204298 | 17q23.1           |
| RP11-655A7   | COL3A1   | 189708272 | 189880147 | 171875 | 2q32.2            |
| RP11-639O1   | ETV6     | 11737815  | 11916241  | 178426 | 12p13.2           |
| RP11-418C2   | ETV6     | 11916329  | 12086277  | 169948 | 12p13.2           |
| RP11-91O9    | WWOX     | 78053568  | 78205164  | 151596 | 16q23.1           |
| RP11-72G1    | WWOX     | 78147069  | 78342268  | 195199 | 16q23.1           |
| RP11-345K17  | WWOX     | 78275875  | 78520559  | 244684 | 16q23.1           |
| RP11-264L1   | WWOX     | 78487649  | 78638009  | 150360 | 16q23.1           |
| RP11-994F22  | WWOX     | 78600645  | 78793477  | 192832 | 16q23.1           |
| RP11-1062G14 | WWOX     | 78837285  | 79023146  | 185861 | 16q23.1           |
| RP11-298E11  | WWOX     | 79018177  | 79221790  | 203613 | 16q23.1 - 16q23.2 |
| RP11-101D10  | WWOX     | 79194633  | 79393394  | 198761 | 16q23.1 - 16q23.2 |

**Supplementary Table 4: Putative driver fusion events in 8p11-p12 amplified breast carcinomas**

| Sample | Fusion               | Fusion breakpoints              | 5' gene in CDS? | 5' segment type | 3' gene in CDS? | 3' segment type | Adjusted <i>p</i> -value | Driver Bayesian probability |
|--------|----------------------|---------------------------------|-----------------|-----------------|-----------------|-----------------|--------------------------|-----------------------------|
| 10068  | <i>ABL2-IGFBP5</i>   | chr1:179073904>chr2:217539667   | No              | Intron          | No              | Intron          | 4.02E-04                 | 0.999990417                 |
| 10400  | <i>ADAR-PII5</i>     | chr1:154560641>chr8:75765846    | Yes             | Exon            | No              | Intron          | 0.001203145              | 0.999978125                 |
| 8931   | <i>ASB7-MEF2A</i>    | chr15:101152632>chr15:100138635 | Yes             | Exon            | No              | Intron          | 0.003786331              | 0.999708744                 |
| 8931   | <i>ASB7-MEF2A</i>    | chr15:101152632>chr15:100173183 | Yes             | Exon            | No              | Intron          | 0.003786331              | 0.999708744                 |
| 7325   | <i>ATAD2-INSR</i>    | chr8:124361525>chr19:7152938    | Yes             | Exon            | Yes             | Exon            | 0.018215303              | 0.998344063                 |
| 10408  | <i>B2M-ETV6</i>      | chr15:45010150>chr12:11988371   | No              | Intron          | Yes             | Intron          | 2.90E-05                 | 0.999995858                 |
| 11315  | <i>BCL2-IGFBP5</i>   | chr18:60983420>chr2:217540036   | Yes             | Intron          | No              | Intron          | 0.040741279              | 0.978874892                 |
| 11315  | <i>BCL2-IGFBP5</i>   | chr18:60983421>chr2:217540037   | Yes             | Intron          | No              | Intron          | 0.040741279              | 0.978874892                 |
| 11315  | <i>BCL2-RHOBTB3</i>  | chr18:60981376>chr5:95130935    | Yes             | Intron          | No              | Intron          | 0.040741279              | 0.978874892                 |
| 10068  | <i>CLTC-COL3A1</i>   | chr17:57760118>chr2:189877010   | Yes             | Exon            | No              | Intron          | 0.215073028              | 0.964154495                 |
| 10569  | <i>COL12A1-WWP1</i>  | chr6:75822948>chr8:87423956     | Yes             | Exon            | Yes             | Exon            | 0.429016568              | 0.877423838                 |
| 10569  | <i>COL12A1-WWP1</i>  | chr6:75822948>chr8:87423957     | Yes             | Exon            | Yes             | Exon            | 0.429016568              | 0.877423838                 |
| 10068  | <i>COL1A2-MACF1</i>  | chr7:94057752>chr1:39856521     | Yes             | Exon            | Yes             | Intron          | 0.36978708               | 0.929564366                 |
| 10068  | <i>COL1A2-TRPS1</i>  | chr7:94059813>chr8:116421597    | No              | Intron          | No              | Intron          | 0.198345903              | 0.981109914                 |
| 10569  | <i>COL1A2-TRPS1</i>  | chr7:94059788>chr8:116662316    | No              | Intron          | No              | Intron          | 7.78E-04                 | 0.999972202                 |
| 10400  | <i>CPB1-TRPS1</i>    | chr3:148558738>chr8:116426569   | Yes             | Exon            | Yes             | Exon            | 0.124155579              | 0.986455755                 |
| 11659  | <i>DDX17-TRPS1</i>   | chr22:38888654>chr8:116681014   | Yes             | Intron          | No              | Intron          | 5.85E-04                 | 0.999883024                 |
| 11659  | <i>DDX17-TRPS1</i>   | chr22:38888655>chr8:116681015   | Yes             | Intron          | No              | Intron          | 5.85E-04                 | 0.999883024                 |
| 11315  | <i>DDX5-WWOX</i>     | chr17:62496139>chr16:78589835   | Yes             | Exon            | Yes             | Intron          | 0.012819635              | 0.996676391                 |
| 11315  | <i>DDX5-WWOX</i>     | chr17:62496141>chr16:78589833   | Yes             | Exon            | Yes             | Intron          | 0.012819635              | 0.996676391                 |
| 10068  | <i>DDX6-COL1A2</i>   | chr11:118619225>chr7:94060368   | No              | Intron          | No              | Intron          | 0.199591359              | 0.976239124                 |
| 10068  | <i>DDX6-COL1A2</i>   | chr11:118619227>chr7:94060366   | No              | Intron          | No              | Intron          | 0.199591359              | 0.976239124                 |
| 11315  | <i>DEPTOR-ZNF704</i> | chr8:120977650>chr8:81733850    | Yes             | Exon            | No              | Intron          | 0.01438201               | 0.995738664                 |
| 11378  | <i>ERBB2-AHNAK</i>   | chr17:37882045>chr11:62288082   | Yes             | Exon            | Yes             | Exon            | 0.1799945                | 0.955001375                 |
| 11378  | <i>ERBB2-AHNAK</i>   | chr17:37882044>chr11:62288083   | Yes             | Exon            | Yes             | Exon            | 0.1799945                | 0.955001375                 |
| 11378  | <i>ERBB2-CTNNA1</i>  | chr17:37868282>chr5:138260947   | Yes             | Exon            | Yes             | Exon            | 0.1799945                | 0.955001375                 |
| 11378  | <i>ERBB2-LUC7L3</i>  | chr17:37882358>chr17:48829549   | Yes             | Intron          | No              | Intron          | 0.164758186              | 0.991762091                 |
| 8931   | <i>ESR1-C6orf211</i> | chr6:152201906>chr6:151775683   | Yes             | Exon            | Yes             | Exon            | 0.002959268              | 0.999317092                 |
| 8931   | <i>ESR1-C6orf211</i> | chr6:152201910>chr6:151775683   | Yes             | Intron          | Yes             | Exon            | 0.002959268              | 0.999317092                 |
| 11315  | <i>ESR1-IGFBP5</i>   | chr6:152419999>chr2:217537385   | Yes             | Exon            | No              | Intron          | 0.003023309              | 0.999888026                 |
| 11315  | <i>ESR1-IGFBP5</i>   | chr6:152201886>chr2:217539806   | Yes             | Exon            | No              | Intron          | 0.111414206              | 0.929850315                 |
| 10400  | <i>FGFR1-CPB1</i>    | chr8:38270916>chr3:148562497    | No              | Intron          | Yes             | Exon            | 0.002699831              | 0.999901824                 |
| 10400  | <i>FGFR1-PII5</i>    | chr8:38277867>chr8:75757445     | Yes             | Intron          | Yes             | Exon            | 0.021172465              | 0.998845138                 |
| 10569  | <i>FNI-TRPS1</i>     | chr2:216243914>chr8:116426876   | Yes             | Exon            | Yes             | Exon            | 9.65E-04                 | 0.999931045                 |
| 10569  | <i>FNI-TRPS1</i>     | chr2:216274787>chr8:116538622   | Yes             | Exon            | Yes             | Intron          | 0.019775538              | 0.995056115                 |
| 10569  | <i>FNI-TRPS1</i>     | chr2:216274788>chr8:116538623   | Yes             | Exon            | Yes             | Intron          | 0.019775538              | 0.995056115                 |
| 10068  | <i>IGFBP5-ABL2</i>   | chr2:217537840>chr1:179076778   | No              | Intron          | No              | Intron          | 0.089924551              | 0.995717879                 |
| 11315  | <i>IGFBP5-CA12</i>   | chr2:217539466>chr15:63616867   | No              | Intron          | No              | Intron          | 0.011561728              | 0.995717879                 |
| 11315  | <i>IGFBP5-CA12</i>   | chr2:217538433>chr15:63616872   | No              | Intron          | No              | Intron          | 0.011561728              | 0.995717879                 |
| 11315  | <i>IGFBP5-ESR1</i>   | chr2:217537729>chr6:152421653   | No              | Intron          | No              | Intron          | 0.002774398              | 0.999486223                 |
| 11315  | <i>IGFBP5-MACF1</i>  | chr2:217542904>chr1:39753105    | Yes             | Exon            | Yes             | Exon            | 0.017717691              | 0.992781681                 |
| 11315  | <i>IGFBP5-TMEM64</i> | chr2:217541084>chr8:91636460    | No              | Intron          | No              | Intron          | 0.002774398              | 0.999486223                 |
| 8629   | <i>LYRM4-SFMBT2</i>  | chr6:5216851>chr10:7327916      | Yes             | Exon            | Yes             | Exon            | 0.467271142              | 0.875394362                 |
| 10408  | <i>MACF1-YWHAZ</i>   | chr1:39952004>chr8:101932726    | No              | Intron          | No              | Intron          | 0.241265449              | 0.931067015                 |
| 11372  | <i>MAST2-PRKCA</i>   | chr1:46425149>chr17:64683229    | Yes             | Exon            | Yes             | Exon            | 0.139249908              | 0.988395841                 |
| 11378  | <i>MAST2-PRKCA</i>   | chr1:46425149>chr17:64683229    | Yes             | Exon            | Yes             | Exon            | 0.11604159               | 0.988395841                 |
| 11659  | <i>MGP-TRPS1</i>     | chr12:15038695>chr8:116426080   | Yes             | Exon            | No              | Intron          | 0.023167852              | 0.988416074                 |
| 11659  | <i>MGP-TRPS1</i>     | chr12:15035072>chr8:116616544   | Yes             | Exon            | Yes             | Exon            | 0.023167852              | 0.988416074                 |
| 11315  | <i>MMP16-ZNF34</i>   | chr8:89053096>chr8:146003910    | No              | Intron          | Yes             | Exon            | 0.470695754              | 0.668769654                 |
| 11315  | <i>MMP16-ZNF34</i>   | chr8:89058897>chr8:146003910    | Yes             | Exon            | Yes             | Exon            | 0.470695754              | 0.668769654                 |
| 11315  | <i>MMP16-ZNF34</i>   | chr8:89053965>chr8:146003910    | Yes             | Exon            | Yes             | Exon            | 0.470695754              | 0.668769654                 |
| 10823  | <i>MTF1-SLCO1B1</i>  | chr1:38304297>chr12:21325584    | Yes             | Exon            | Yes             | Exon            | 0.027132269              | 0.997193214                 |
| 10823  | <i>MTF1-SLCO1B1</i>  | chr1:38304297>chr12:21329710    | Yes             | Exon            | Yes             | Exon            | 0.027132269              | 0.997193214                 |



|       |                       |                               |     |        |     |        |             |             |
|-------|-----------------------|-------------------------------|-----|--------|-----|--------|-------------|-------------|
| 10823 | <i>MTUS1-TRPS1</i>    | chr8:17601113>chr8:116430680  | Yes | Exon   | Yes | Exon   | 0.00281909  | 0.99990279  |
| 10569 | <i>NBN-COL3A1</i>     | chr8:90971025>chr2:189839203  | Yes | Exon   | No  | Intron | 0.00283485  | 0.999696266 |
| 7253  | <i>NCK1-CLSTN2</i>    | chr3:136647069>chr3:139894793 | Yes | Exon   | Yes | Exon   | 0.00958784  | 0.99520608  |
| 10569 | <i>NFKBIZ-FN1</i>     | chr3:101574901>chr2:216260274 | Yes | Intron | Yes | Intron | 0.443035777 | 0.841772937 |
| 10823 | <i>NUDCD1-RAD54B</i>  | chr8:110283234>chr8:95479783  | Yes | Exon   | No  | Intron | 0.124243172 | 0.978578764 |
| 10400 | <i>PI15-TRPS1</i>     | chr8:75763042>chr8:116617015  | No  | Intron | Yes | Exon   | 0.034412409 | 0.997497279 |
| 10068 | <i>PLXDC2-FN1</i>     | chr10:20569819>chr2:216279615 | No  | Intron | Yes | Exon   | 0.170504595 | 0.9878211   |
| 11315 | <i>PSPCI-TRPS1</i>    | chr13:20304379>chr8:116430680 | Yes | Exon   | Yes | Exon   | 0.005592611 | 0.999585733 |
| 8629  | <i>RAB2A-CHD7</i>     | chr8:61504528>chr8:61653818   | Yes | Exon   | No  | Intron | 0.007969021 | 0.998937464 |
| 8629  | <i>RAB2A-CHD7</i>     | chr8:61484672>chr8:61693559   | Yes | Exon   | Yes | Exon   | 0.007969021 | 0.998937464 |
| 8931  | <i>RIN2-SLC24A3</i>   | chr20:19972943>chr20:19496132 | Yes | Exon   | Yes | Exon   | 0.227555444 | 0.912478675 |
| 8629  | <i>RPAIN-RABEP1</i>   | chr17:5331531>chr17:5250085   | Yes | Exon   | Yes | Exon   | 0.416198058 | 0.861267314 |
| 10415 | <i>SKIL-PRRC2B</i>    | chr3:170110915>chr9:134330495 | No  | Intron | Yes | Exon   | 0.434368897 | 0.945703888 |
| 11659 | <i>SLC39A8-TRPS1</i>  | chr4:103183528>chr8:116631981 | No  | Intron | Yes | Exon   | 0.001428648 | 0.999571406 |
| 11659 | <i>SLC39A8-TRPS1</i>  | chr4:103183527>chr8:116631980 | No  | Intron | Yes | Exon   | 0.001428648 | 0.999571406 |
| 10569 | <i>SPARC-MGP</i>      | chr5:151042777>chr12:15035003 | No  | Intron | No  | Intron | 0.004188382 | 0.999252075 |
| 11315 | <i>TMEM64-ZNF704</i>  | chr8:91637222>chr8:81672849   | No  | Intron | Yes | Intron | 0.003857349 | 0.999571406 |
| 11315 | <i>TRMT1L-RALGPS2</i> | chr1:185113038>chr1:178745817 | Yes | Exon   | No  | Intron | 0.017114966 | 0.992393349 |
| 8860  | <i>TRPS1-ANKRD30A</i> | chr8:116425696>chr10:37430974 | No  | Intron | Yes | Exon   | 0.145727334 | 0.995776019 |
| 11659 | <i>TRPS1-C6orf211</i> | chr8:116599677>chr6:151790689 | Yes | Exon   | No  | Intron | 0.141932844 | 0.886453724 |
| 10400 | <i>TRPS1-CPB1</i>     | chr8:116616434>chr3:148567056 | Yes | Exon   | Yes | Intron | 0.093772173 | 0.991475257 |
| 10569 | <i>TRPS1-FN1</i>      | chr8:116595188>chr2:216256401 | Yes | Intron | Yes | Exon   | 0.00344624  | 0.99950768  |
| 10823 | <i>TRPS1-HECTD1</i>   | chr8:116465658>chr14:31576001 | Yes | Intron | Yes | Exon   | 0.470405999 | 0.886453724 |
| 8860  | <i>TRPS1-IQGAP1</i>   | chr8:116427260>chr15:91029819 | Yes | Exon   | Yes | Intron | 0.472858604 | 0.97944093  |
| 10823 | <i>TRPS1-MTUS1</i>    | chr8:116617104>chr8:17651601  | Yes | Exon   | No  | Intron | 0.020401604 | 0.998592993 |
| 8860  | <i>TRPS1-NF1</i>      | chr8:116599672>chr17:29435023 | Yes | Exon   | Yes | Intron | 0.020096678 | 0.999708744 |
| 10400 | <i>TRPS1-RNF213</i>   | chr8:116616836>chr17:78263532 | Yes | Exon   | Yes | Exon   | 0.161535548 | 0.97944093  |
| 11659 | <i>WARS2-DDX4</i>     | chr1:119683178>chr5:55041992  | Yes | Exon   | Yes | Exon   | 0.132521351 | 0.907235054 |
| 11315 | <i>WWOX-DDX5</i>      | chr16:78910763>chr17:62500878 | Yes | Intron | Yes | Exon   | 0.023494565 | 0.988687802 |
| 8629  | <i>ZFAND3-ATRX</i>    | chr6:37897775>chrX:76972720   | Yes | Exon   | Yes | Exon   | 0.006428915 | 0.999571406 |

The adjusted  $p$ -value is the Bayesian probability of the fusion being a passenger event and the Bayesian driver probability is the probability of the fusion being a driver event. Fusion events with adjusted  $P < 0.5$  were classified as “driver” fusions.
